# Supplementary material
Source: PubMed Central journal article supplement (PMC7752839)
Supplement: NIHMS1647573-supplement-1.pdf [file NIHMS1647573-supplement-1.pdf]

## Supplementary Material

|                                                                                                                                                                                                   |    |
|---------------------------------------------------------------------------------------------------------------------------------------------------------------------------------------------------|----|
| Item S1: Supplementary Methods .....                                                                                                                                                              | 2  |
| Study Data.....                                                                                                                                                                                   | 2  |
| CKD Progression Risk Factors .....                                                                                                                                                                | 2  |
| Data Collection .....                                                                                                                                                                             | 2  |
| Outcomes and Censoring Events.....                                                                                                                                                                | 2  |
| Table S1a. Intermediate models of chronic kidney disease progression adjusted only for demographic, kidney function and blood pressure risk factors among CRIC participants without diabetes..... | 4  |
| Table S1b. Intermediate models of chronic kidney disease progression adjusted only for demographic, kidney function and blood pressure risk factors among CRIC participants with diabetes.....    | 9  |
| Table S2a. Final multivariable-adjusted models of chronic kidney disease progression among CRIC participants without diabetes after exclusion of albuminuria .....                                | 14 |
| Table S2b. Final multivariable-adjusted models of chronic kidney disease progression among CRIC participants with diabetes after exclusion of albuminuria.....                                    | 17 |
| Table S3a. Multivariable-adjusted models of chronic kidney disease progression with albuminuria interaction among CRIC participants without diabetes .....                                        | 20 |
| Table S3b. Multivariable-adjusted models of chronic kidney disease progression with albuminuria interaction among CRIC participants with diabetes.....                                            | 27 |
| Table S4a. Multivariable-adjusted models of chronic kidney disease progression with race interaction among CRIC participants without diabetes .....                                               | 32 |
| Table S4b. Multivariable-adjusted models of chronic kidney disease progression with race interaction among CRIC participants with diabetes.....                                                   | 42 |
| References .....                                                                                                                                                                                  | 49 |

## Item S1: Supplementary Methods

### Study Data

#### **CKD Progression Risk Factors**

The set of demographic risk factors were: age (21-44, 45-64, and 65-75 years), gender, and race/ethnicity (non-Hispanic white, non-Hispanic black with low-risk APOL1 genotype, non-Hispanic black with high-risk APOL1 genotype, Hispanic, and other). APOL1 risk genotype was assessed using the number of G1 and G2 risk alleles characterizing individuals with black race as either low-risk (0 or 1 copies of an APOL1 risk allele) or high-risk (2 copies of a risk allele).<sup>1</sup> Kidney function measures included eGFR (<30, 30-44, 45-59, and  $\geq 60$  mL/min/1.73m<sup>2</sup>), and urine albumin:creatinine ratio (UACR; <30, 30-299,  $\geq 300$  mg/g). Blood pressure factors included systolic blood pressure (SBP; <120, 120-139,  $\geq 140$  mmHg) and self-reported use of an angiotensin converting enzyme inhibitor or angiotensin receptor blocker (ACE/ARB). Clinical risk factors included self-reported history of cardiovascular disease (CVD; myocardial infarction or revascularization, heart failure, stroke, or peripheral arterial disease) and serum uric acid level (<6.5, 6.5-8.1,  $\geq 8.2$  mg/dL). The socioeconomic factor was level of education (did not complete high school, high school diploma/some college, college graduate/graduate school) and behavioral factor was current smoking. Body composition measures included body mass index (<28, 28-34,  $\geq 35$  kg/m<sup>2</sup>), and fat-free mass in kilograms estimated using bioelectrical impedance analysis.<sup>2,3</sup> Ankle-brachial index (<0.9, 0.9-1.0, 1.1-1.3,  $\geq 1.4$ ) was included as a peripheral vascular measure. Gender-specific categories of hemoglobin were used as a measure of anemia (<11, 11-12,  $\geq 13$  g/dL for women and <12, 12-13,  $\geq 14$  for men). High-sensitivity C-reactive protein (hsCRP) represented an inflammatory marker, and serum fractalkine (CX3CL1) and plasma CXCL12 were included as available inflammatory chemokines. Mineral metabolism markers included fibroblast growth factor-23 (FGF-23), serum phosphate, and intact parathyroid hormone (iPTH), and carbohydrate metabolism markers were hemoglobin A1c (HbA1c) and insulin resistance estimated by the Homeostatic Model Assessment (HOMA-IR) calculated using fasting plasma glucose and insulin.<sup>4</sup> High-sensitivity Troponin T (hsTnT) and N-terminal pro-B-type natriuretic peptide (NTproBNP) were the considered cardiac markers. Serum bicarbonate served as the acidosis measure, urinary electrolytes included urine sodium and potassium, urine neutrophil gelatinase-associated lipocalin (NGAL) was used as a marker of kidney injury, and serum aldosterone was included as a marker related to the renin-angiotensin-aldosterone system. Continuous variables were assessed using quartiles unless otherwise noted.

#### **Data Collection**

SBP was measured in triplicate following a standardized protocol with the participant seated using a Tycos Classic hand cuff and aneroid sphygmomanometer. The baseline SBP value was the mean of all measurements. Self-reported current use of cigarettes along with at least 100 cigarettes smoked ever defined current smoking. Anthropometric measures were assessed using standard protocols.<sup>5</sup> Participants were queried about any medication usage in the prior 30 days. Serum creatinine was measured at the CRIC Central Laboratory using an enzymatic method ([www.orthoclinical.com](http://www.orthoclinical.com)) for samples collected through October 2008 and by the Jaffe method ([www.beckmancoulter.com](http://www.beckmancoulter.com)), thereafter, standardized to isotope dilution mass spectrometry-traceable values.<sup>6,7</sup> Serum cystatin C was measured by particle-enhanced immunonephelometric assay on the Siemens BN<sup>TM</sup> II System ([www.siemens.com](http://www.siemens.com)). Estimated GFR was calculated from serum creatinine and cystatin C using a CRIC Study equation.<sup>8</sup> Hemoglobin was obtained as part of a complete blood count at each of the CRIC clinical sites using local clinical laboratories. Hemoglobin A1c was analyzed in whole blood; CXCL12, glucose, insulin, hsCRP, iPTH, FGF-23, hsTnT, NTproBNP were measured in plasma; and uric acid, fractalkine, phosphate, bicarbonate, and aldosterone were evaluated using a serum sample. Urine albumin, creatinine, sodium, potassium, and NGAL were measured in 24-hour urine samples.

#### **Outcomes and Censoring Events**

KRT was defined as the initiation of maintenance dialysis or kidney transplantation and was ascertained through self-report and supplemented by data from the United States Renal Data System (USRDS). For participants who developed KRT, the eGFR from the Centers for Medicare and Medicaid Services Medical Evidence Form 2728 at onset of KRT was assigned as the last GFR value when available; for the remainder of participants reaching KRT, the mean eGFR reported by the USRDS for the age range in

CRIC (i.e., 10.8 mL/min/1.73m<sup>2</sup>) was assigned. Time to eGFR halving was imputed assuming a linear decline in kidney function between in-person annual visit measures.<sup>9</sup>

Deaths were determined from reports of next of kin, death certificates, obituaries, reviews of hospital records, the Social Security Death Master File and the National Death Index.

**Table S1a. Intermediate models of chronic kidney disease progression adjusted only for demographic, kidney function and blood pressure risk factors among CRIC participants without diabetes**

|                                                    |                           | Without Diabetes                               |         |                  |         |
|----------------------------------------------------|---------------------------|------------------------------------------------|---------|------------------|---------|
|                                                    |                           | eGFR Slope,<br>mL/min/1.73m <sup>2</sup> /year |         | KRT/eGFR Halving |         |
|                                                    |                           | Beta Coefficient <sup>a</sup><br>(SE)          | P value | HR (95% CI)      | P value |
| <b>Demographic Factors</b>                         |                           |                                                |         |                  |         |
| Age,<br>years                                      | <44                       | -0.1 (0.1)                                     | .4      | 1.3 (1.0, 1.7)   | .1      |
|                                                    | 45-64                     | Ref                                            |         | Ref              |         |
|                                                    | 65-75                     | -0.1 (0.1)                                     |         | 1.0 (0.8, 1.3)   |         |
| Gender                                             | Male                      | Ref                                            | .003    | Ref              | .002    |
|                                                    | Female                    | 0.3 (0.1)                                      |         | 0.7 (0.6, 0.9)   |         |
| Race/<br>ethnicity                                 | NH-White                  | Ref                                            | <.001   | Ref              | <.001   |
|                                                    | NH-Black, APOL1 low-risk  | -0.2 (0.1)                                     |         | 1.8 (1.4, 2.3)   |         |
|                                                    | NH-Black, APOL1 high-risk | -0.6 (0.2)                                     |         | 2.3 (1.7, 3.1)   |         |
|                                                    | Hispanic                  | 0.1 (0.2)                                      |         | 1.2 (0.8, 1.8)   |         |
|                                                    | Other                     | -0.4 (0.2)                                     |         | 2.3 (1.4, 3.7)   |         |
| <b>Kidney Function Measures</b>                    |                           |                                                |         |                  |         |
| Baseline<br>eGFR,<br>mL/min/<br>1.73m <sup>2</sup> | <30                       | 0.2 (0.2)                                      | .04     | 2.1 (1.7, 2.7)   | <.001   |
|                                                    | 30-44.9                   | Ref                                            |         | Ref              |         |
|                                                    | 45-59.9                   | 0.0 (0.1)                                      |         | 0.5 (0.4, 0.7)   |         |
|                                                    | ≥60                       | 0.3 (0.1)                                      |         | 0.2 (0.1, 0.3)   |         |
| UACR,<br>mg/g                                      | <30                       | Ref                                            | <.001   | Ref              | <.001   |
|                                                    | 30-299                    | -1.0 (0.1)                                     |         | 3.5 (2.6, 4.8)   |         |
|                                                    | ≥300                      | -2.3 (0.1)                                     |         | 10.6 (7.8, 14.4) |         |
| <b>Blood Pressure Factors</b>                      |                           |                                                |         |                  |         |
| Systolic BP,<br>mmHg                               | <120                      | Ref                                            | <.001   | Ref              | .003    |
|                                                    | 120-139                   | -0.2 (0.1)                                     |         | 1.3 (1.1, 1.7)   |         |
|                                                    | ≥140                      | -0.5 (0.1)                                     |         | 1.5 (1.2, 2.0)   |         |
| ACE/ARB                                            | No                        | Ref                                            | .04     | Ref              | .8      |
|                                                    | Yes                       | 0.2 (0.1)                                      |         | 1.0 (0.8, 1.3)   |         |
| <b>Clinical Factors</b>                            |                           |                                                |         |                  |         |
| History of<br>CVD                                  | No                        | Ref                                            | .6      | Ref              | .8      |
|                                                    | Yes                       | -0.1 (0.1)                                     |         | 1.0 (0.8, 1.2)   |         |

|                                           |                          | Without Diabetes                               |         |                  |         |
|-------------------------------------------|--------------------------|------------------------------------------------|---------|------------------|---------|
|                                           |                          | eGFR Slope,<br>mL/min/1.73m <sup>2</sup> /year |         | KRT/eGFR Halving |         |
|                                           |                          | Beta Coefficient <sup>a</sup><br>(SE)          | P value | HR (95% CI)      | P value |
| Uric acid,<br>mg/dL                       | <6.5                     | Ref                                            | .9      | Ref              | .9      |
|                                           | 6.5-8.9                  | 0.0 (0.1)                                      |         | 1.1 (0.8, 1.4)   |         |
|                                           | ≥8.2                     | 0.0 (0.1)                                      |         | 1.1 (0.8, 1.4)   |         |
| <b>Socioeconomic Status Factor</b>        |                          |                                                |         |                  |         |
| Education                                 | Less than High School    | 0.0 (0.1)                                      | .5      | 1.1 (0.8, 1.4)   | .6      |
|                                           | High School/Some College | Ref                                            |         | Ref              |         |
|                                           | Graduated College        | -0.1 (0.1)                                     |         | 1.1 (0.9, 1.4)   |         |
| <b>Behavioral Factor</b>                  |                          |                                                |         |                  |         |
| Current Smoker                            | No                       | Ref                                            | .6      | Ref              | .3      |
|                                           | Yes                      | -0.1 (0.1)                                     |         | 1.2 (0.9, 1.5)   |         |
| <b>Body Composition Measures</b>          |                          |                                                |         |                  |         |
| BMI,<br>kg/m <sup>2</sup>                 | <28                      | -0.1 (0.1)                                     | .3      | 1.0 (0.8, 1.3)   | .3      |
|                                           | 28-34.9                  | Ref                                            |         | Ref              |         |
|                                           | ≥35                      | 0.0 (0.1)                                      |         | 0.8 (0.6, 1.1)   |         |
| Fat-free mass,<br>kg                      | Q1: [25.8, 49.1)         | Ref                                            | .1      | Ref              | .02     |
|                                           | Q2: [49.1, 59.1)         | 0.3 (0.1)                                      |         | 0.7 (0.5, 0.9)   |         |
|                                           | Q3: [59.1, 69.9)         | 0.3 (0.1)                                      |         | 0.6 (0.5, 0.9)   |         |
|                                           | Q4: [69.9, 167.1)        | 0.2 (0.2)                                      |         | 0.8 (0.6, 1.1)   |         |
| <b>Peripheral Vascular Measure</b>        |                          |                                                |         |                  |         |
| Ankle-brachial index                      | <0.9                     | -0.3 (0.2)                                     | .2      | 1.2 (0.8, 1.6)   | .2      |
|                                           | 0.9-1.09                 | Ref                                            |         | Ref              |         |
|                                           | 1.1-1.39                 | 0.0 (0.1)                                      |         | 0.9 (0.7, 1.1)   |         |
|                                           | ≥1.4                     | -0.4 (0.4)                                     |         | 1.6 (0.7, 3.7)   |         |
| <b>Measure of Anemia</b>                  |                          |                                                |         |                  |         |
| Hemoglobin,<br>mg/dL                      | M: <12, F: <11           | 0.1 (0.1)                                      | .3      | 1.3 (1.0, 1.7)   | .003    |
|                                           | M: 12-13.9, F: 11-12.9   | Ref                                            |         | Ref              |         |
|                                           | M: ≥14, F: ≥13           | 0.1 (0.1)                                      |         | 0.8 (0.6, 1.0)   |         |
| <b>Inflammatory Marker and Chemokines</b> |                          |                                                |         |                  |         |
| hsCRP,<br>mg/L                            | Q1: [0.1, 1.0)           | Ref                                            | .9      | Ref              | .6      |
|                                           | Q2: [1.0, 2.5)           | 0.0 (0.1)                                      |         | 1.0 (0.8, 1.4)   |         |
|                                           | Q3: [2.5, 6.3)           | 0.1 (0.1)                                      |         | 0.9 (0.7, 1.2)   |         |

|                                            |                       | Without Diabetes                               |         |                  |         |
|--------------------------------------------|-----------------------|------------------------------------------------|---------|------------------|---------|
|                                            |                       | eGFR Slope,<br>mL/min/1.73m <sup>2</sup> /year |         | KRT/eGFR Halving |         |
|                                            |                       | Beta Coefficient <sup>a</sup><br>(SE)          | P value | HR (95% CI)      | P value |
|                                            | Q4: [6.3, 187)        | 0.0 (0.1)                                      |         | 1.0 (0.8, 1.4)   |         |
| Serum<br>fractalkine<br>(CX3CL1),<br>pg/mL | Q1: [0.1, 0.6)        | Ref                                            | .9      | Ref              | .3      |
|                                            | Q2: [0.6, 0.8)        | 0.0 (0.1)                                      |         | 1.3 (1.0, 1.8)   |         |
|                                            | Q3: [0.8, 1.1)        | 0.1 (0.1)                                      |         | 1.2 (0.8, 1.6)   |         |
|                                            | Q4: [1.1, 3.6]        | 0.0 (0.1)                                      |         | 1.3 (1.0, 1.8)   |         |
| Plasma<br>CXCL12,<br>pg/mL                 | Q1: [832.1, 2066.4)   | Ref                                            | .3      | Ref              | .2      |
|                                            | Q2: [2066.4, 2410.5)  | -0.2 (0.1)                                     |         | 1.2 (0.9, 1.7)   |         |
|                                            | Q3: [2410.5, 2797.8)  | -0.1 (0.1)                                     |         | 1.3 (1.0, 1.7)   |         |
|                                            | Q4: [2797.8, 6173.3]  | -0.2 (0.1)                                     |         | 1.4 (1.0, 1.8)   |         |
| <b>Mineral Metabolism Markers</b>          |                       |                                                |         |                  |         |
| FGF23,<br>RU/mL                            | Q1: [1.4, 94.1)       | Ref                                            | .1      | Ref              | .1      |
|                                            | Q2: [94.1, 139.1)     | 0.0 (0.1)                                      |         | 1.4 (1.0, 1.9)   |         |
|                                            | Q3: [139.1, 225.5)    | 0.2 (0.1)                                      |         | 1.4 (1.0, 1.9)   |         |
|                                            | Q4: [225.5, 14 318.9] | 0.3 (0.1)                                      |         | 1.4 (1.0, 1.9)   |         |
| Serum<br>phosphate,<br>mg/dL               | Q1: [1.7, 3.3)        | -0.3 (0.1)                                     | .09     | 1.4 (1.0, 1.8)   | .02     |
|                                            | Q2: [3.3, 3.7)        | Ref                                            |         | Ref              |         |
|                                            | Q3: [3.7, 4.1)        | 0.0 (0.1)                                      |         | 1.5 (1.1, 2.0)   |         |
|                                            | Q4: [4.1, 9.3]        | -0.1 (0.1)                                     |         | 1.4 (1.0, 1.9)   |         |
| Intact PTH<br>pg/mL                        | Q1: [1.9, 34.1)       | 0.2 (0.1)                                      | .3      | 1.0 (0.7, 1.4)   | .6      |
|                                            | Q2: [34.1, 52.4)      | Ref                                            |         | Ref              |         |
|                                            | Q3: [52.4, 84.7)      | 0.1 (0.1)                                      |         | 1.0 (0.8, 1.4)   |         |
|                                            | Q4: [84.5, 1483]      | 0.0 (0.1)                                      |         | 1.2 (0.9, 1.6)   |         |
| <b>Carbohydrate Metabolism Markers</b>     |                       |                                                |         |                  |         |
| HbA1c,<br>%                                | Q1: [3.5, 5.6)        | Ref                                            | .8      | Ref              | .6      |
|                                            | Q2: [5.6, 6.2)        | -0.1 (0.1)                                     |         | 0.9 (0.7, 1.1)   |         |
|                                            | Q3: [6.2, 7.3)        | 0.0 (0.1)                                      |         | 0.8 (0.6, 1.1)   |         |
|                                            | Q4: [7.3, 15.2]       | -0.3 (0.5)                                     |         | 0.9 (0.4, 2.3)   |         |
| HOMA-IR                                    | Q1: [0, 2.5)          | Ref                                            | .9      | Ref              | .3      |
|                                            | Q2: [2.5, 4.1)        | 0.0 (0.1)                                      |         | 0.9 (0.7, 1.2)   |         |
|                                            | Q3: [4.1, 7.2)        | 0.1 (0.1)                                      |         | 1.0 (0.8, 1.3)   |         |
|                                            | Q4: [7.2, 224.8)      | 0.1 (0.2)                                      |         | 0.7 (0.5, 1.0)   |         |

|                                 |                     | Without Diabetes                               |         |                  |         |
|---------------------------------|---------------------|------------------------------------------------|---------|------------------|---------|
|                                 |                     | eGFR Slope,<br>mL/min/1.73m <sup>2</sup> /year |         | KRT/eGFR Halving |         |
|                                 |                     | Beta Coefficient <sup>a</sup><br>(SE)          | P value | HR (95% CI)      | P value |
| <b>Cardiac Markers</b>          |                     |                                                |         |                  |         |
| hsTnT,<br>pg/mL                 | Q1: [1.5, 5.5)      | Ref                                            | .7      | Ref              | .2      |
|                                 | Q2: [5.5, 11.4)     | 0.1 (0.1)                                      |         | 1.2 (0.9, 1.5)   |         |
|                                 | Q3: (11.4, 22.2)    | 0.0 (0.1)                                      |         | 0.9 (0.6, 1.2)   |         |
|                                 | Q4: (22.2, 738.7)   | 0.2 (0.2)                                      |         | 1.0 (0.7, 1.4)   |         |
| NTproBNP,<br>pg/mL              | Q1: [2.5, 60.2)     | Ref                                            | .02     | Ref              | .004    |
|                                 | Q2: [60.2, 139.4)   | -0.2 (0.1)                                     |         | 1.5 (1.1, 2.1)   |         |
|                                 | Q3: [139.4, 366.6)  | -0.4 (0.1)                                     |         | 1.7 (1.3, 2.4)   |         |
|                                 | Q4: [366.6, 33 742] | -0.2 (0.1)                                     |         | 1.7 (1.2, 2.4)   |         |
| <b>Acidosis Marker</b>          |                     |                                                |         |                  |         |
| Serum<br>bicarbonate,<br>mmol/L | ≤22                 | -0.1 (0.1)                                     | .8      | 1.5 (1.2, 2.0)   | .005    |
|                                 | (22, 24]            | Ref                                            |         | Ref              |         |
|                                 | (24, 26]            | 0.0 (0.1)                                      |         | 1.0 (0.7, 1.4)   |         |
|                                 | >26                 | 0.0 (0.1)                                      |         | 1.1 (0.8, 1.5)   |         |
| <b>Urinary Electrolytes</b>     |                     |                                                |         |                  |         |
| Urine<br>sodium,<br>mEq/24h     | Q1: [4.3, 108.6)    | Ref                                            | .2      | Ref              | .5      |
|                                 | Q2: [108.6, 151.3)  | 0.2 (0.1)                                      |         | 0.8 (0.6, 1.1)   |         |
|                                 | Q3: [151.3, 203.1)  | 0.1 (0.1)                                      |         | 0.9 (0.7, 1.2)   |         |
|                                 | Q4: [203.1, 699.8]  | 0.2 (0.1)                                      |         | 0.9 (0.7, 1.2)   |         |
| Urine<br>potassium,<br>mmol/24h | Q1: [3.0, 37.5)     | Ref                                            | .05     | Ref              | .5      |
|                                 | Q2: [37.5, 51.8)    | 0.0 (0.1)                                      |         | 1.1 (0.9, 1.5)   |         |
|                                 | Q3: [51.8, 69.4)    | -0.1 (0.1)                                     |         | 1.3 (0.9, 1.7)   |         |
|                                 | Q4: [69.4, 417.7]   | 0.2 (0.1)                                      |         | 1.1 (0.8, 1.5)   |         |
| <b>Kidney Injury Marker</b>     |                     |                                                |         |                  |         |
| Urine NGAL,<br>ng/ml            | Q1: [0.4, 6.3)      | Ref                                            | .06     | Ref              | .005    |
|                                 | Q2: [6.3, 14.2)     | -0.3 (0.1)                                     |         | 1.7 (1.2, 2.4)   |         |
|                                 | Q3: [14.2, 32.9)    | -0.2 (0.1)                                     |         | 1.3 (0.9, 1.9)   |         |
|                                 | Q4: [32.9, 2743.8]  | -0.3 (0.1)                                     |         | 1.7 (1.2, 2.5)   |         |
| <b>RAAS Marker</b>              |                     |                                                |         |                  |         |
|                                 | Q1: [0.8, 71.2)     | Ref                                            | .03     | Ref              | .1      |
|                                 | Q2: [71.2, 101.4)   | -0.3 (0.1)                                     |         | 1.4 (1.0, 1.9)   |         |

|                                |                       | Without Diabetes                               |         |                  |         |
|--------------------------------|-----------------------|------------------------------------------------|---------|------------------|---------|
|                                |                       | eGFR Slope,<br>mL/min/1.73m <sup>2</sup> /year |         | KRT/eGFR Halving |         |
|                                |                       | Beta Coefficient <sup>a</sup><br>(SE)          | P value | HR (95% CI)      | P value |
| Serum<br>aldosterone,<br>pg/mL | Q3: [101.4, 152.8)    | -0.2 (0.1)                                     |         | 1.4 (1.1, 1.9)   |         |
|                                | Q4: [152.8, 15 630.9] | 0.0 (0.1)                                      |         | 1.2 (0.9, 1.6)   |         |

Abbreviations: ACE: angiotensin converting enzyme; ARB: angiotensin receptor blocker; BP: blood pressure; CI: confidence interval; CKD: chronic kidney disease; CVD: cardiovascular disease; eGFR: estimated glomerular filtration rate; KRT: kidney replacement therapy; FGF23: fibroblast growth factor-23; HR: hazard ratio; hsCRP: high-sensitivity C-reactive protein; hsTnT: high-sensitivity troponin T; NGAL: neutrophil gelatinase-associated lipocalin; NH: non-Hispanic; NTproBNP: N-terminal pro-B-type natriuretic peptide; PTH: parathyroid hormone; RAAS: renin-angiotensin-aldosterone system; Ref: reference; SE: standard error; UACR: urine albumin:creatinine ratio

SI conversion: To convert Uric acid to  $\mu\text{mol/L}$ , multiply by 59.485. To convert Hemoglobin to g/L, multiply by 0.01. To convert hsCRP to nmol/L, multiply by 9.524. To convert serum phosphate to mmol/L, multiply by 0.323. For serum bicarbonate, 1 mEq/L is equivalent to 1 mmol/L. For urine potassium, 1 mEq/24h is equivalent to 1 mmol/d. To convert serum aldosterone to pmol/L, multiply by 2.774.

<sup>a</sup> Negative coefficients represent a faster decline in eGFR compared to the reference group.



**Table S1b. Intermediate models of chronic kidney disease progression adjusted only for demographic, kidney function and blood pressure risk factors among CRIC participants with diabetes**

|                                                    |                           | With Diabetes                                  |         |                  |         |
|----------------------------------------------------|---------------------------|------------------------------------------------|---------|------------------|---------|
|                                                    |                           | eGFR Slope,<br>mL/min/1.73m <sup>2</sup> /year |         | KRT/eGFR Halving |         |
|                                                    |                           | Beta Coefficient <sup>a</sup><br>(SE)          | P value | HR (95% CI)      | P value |
| <b>Demographic Factors</b>                         |                           |                                                |         |                  |         |
| Age,<br>years                                      | <44                       | -0.5 (0.2)                                     | .1      | 1.3 (1.0, 1.7)   | .001    |
|                                                    | 45-64                     | Ref                                            |         | Ref              |         |
|                                                    | 65-75                     | 0.0 (0.1)                                      |         | 0.8 (0.6, 0.9)   |         |
| Gender                                             | Male                      | Ref                                            | .6      | Ref              | .01     |
|                                                    | Female                    | -0.1 (0.1)                                     |         | 0.8 (0.7, 1.0)   |         |
| Race/<br>ethnicity                                 | NH-White                  | Ref                                            | <.001   | Ref              | <.001   |
|                                                    | NH-Black, APOL1 low-risk  | -0.7 (0.1)                                     |         | 1.5 (1.2, 1.8)   |         |
|                                                    | NH-Black, APOL1 high-risk | -1.1 (0.3)                                     |         | 1.7 (1.3, 2.3)   |         |
|                                                    | Hispanic                  | -0.5 (0.2)                                     |         | 1.4 (1.1, 1.9)   |         |
|                                                    | Other                     | -0.3 (0.3)                                     |         | 1.2 (0.8, 1.7)   |         |
| <b>Kidney Function Measures</b>                    |                           |                                                |         |                  |         |
| Baseline<br>eGFR,<br>mL/min/<br>1.73m <sup>2</sup> | <30                       | 0.4 (0.2)                                      | <.001   | 1.9 (1.6, 2.3)   | <.001   |
|                                                    | 30-44.9                   | Ref                                            |         | Ref              |         |
|                                                    | 45-59.9                   | -0.4 (0.1)                                     |         | 0.6 (0.5, 0.8)   |         |
|                                                    | ≥60                       | -0.4 (0.2)                                     |         | 0.4 (0.3, 0.6)   |         |
| UACR,<br>mg/g                                      | <30                       | Ref                                            | <.001   | Ref              | <.001   |
|                                                    | 30-299                    | -1.1 (0.1)                                     |         | 2.8 (2.1, 3.7)   |         |
|                                                    | ≥300                      | -2.7 (0.2)                                     |         | 7.1 (5.5, 9.3)   |         |
| <b>Blood Pressure Factors</b>                      |                           |                                                |         |                  |         |
| Systolic BP,<br>mmHg                               | <120                      | Ref                                            | <.001   | Ref              | <.001   |
|                                                    | 120-139                   | -0.2 (0.1)                                     |         | 1.2 (1.0, 1.5)   |         |
|                                                    | ≥140                      | -0.8 (0.2)                                     |         | 1.9 (1.5, 2.3)   |         |
| ACE/ARB                                            | No                        | Ref                                            | .9      | Ref              | .2      |
|                                                    | Yes                       | 0.0 (0.2)                                      |         | 0.9 (0.7, 1.1)   |         |
| <b>Clinical Factors</b>                            |                           |                                                |         |                  |         |
| History of<br>CVD                                  | No                        | Ref                                            | .3      | Ref              | .02     |
|                                                    | Yes                       | -0.1 (0.1)                                     |         | 1.2 (1.0, 1.4)   |         |

|                                           |                          | With Diabetes                                  |         |                  |         |
|-------------------------------------------|--------------------------|------------------------------------------------|---------|------------------|---------|
|                                           |                          | eGFR Slope,<br>mL/min/1.73m <sup>2</sup> /year |         | KRT/eGFR Halving |         |
|                                           |                          | Beta Coefficient <sup>a</sup><br>(SE)          | P value | HR (95% CI)      | P value |
| Uric acid,<br>mg/dL                       | <6.5                     | Ref                                            | .3      | Ref              | .08     |
|                                           | 6.5-8.9                  | -0.2 (0.1)                                     |         | 1.2 (1.0, 1.5)   |         |
|                                           | ≥8.2                     | -0.2 (0.2)                                     |         | 1.3 (1.0, 1.6)   |         |
| <b>Socioeconomic Status Factor</b>        |                          |                                                |         |                  |         |
| Education                                 | Less than High School    | -0.2 (0.2)                                     | .2      | 0.9 (0.8, 1.1)   | .6      |
|                                           | High School/Some College | Ref                                            |         | Ref              |         |
|                                           | Graduated College        | 0.1 (0.1)                                      |         | 0.9 (0.8, 1.1)   |         |
| <b>Behavioral Factor</b>                  |                          |                                                |         |                  |         |
| Current Smoker                            | No                       | Ref                                            | .07     | Ref              | .06     |
|                                           | Yes                      | -0.3 (0.2)                                     |         | 1.2 (1.0, 1.5)   |         |
| <b>Body Composition Measures</b>          |                          |                                                |         |                  |         |
| BMI,<br>kg/m <sup>2</sup>                 | <28                      | -0.2 (0.2)                                     | .5      | 1.1 (0.9, 1.4)   | .4      |
|                                           | 28-34.9                  | Ref                                            |         | Ref              |         |
|                                           | ≥35                      | 0.0 (0.1)                                      |         | 1.0 (0.9, 1.2)   |         |
| Fat-free mass,<br>kg                      | Q1: [25.8, 49.1)         | Ref                                            | .9      | Ref              | .6      |
|                                           | Q2: [49.1, 59.1)         | 0.0 (0.2)                                      |         | 0.9 (0.7, 1.1)   |         |
|                                           | Q3: [59.1, 69.9)         | -0.1 (0.2)                                     |         | 0.9 (0.7, 1.2)   |         |
|                                           | Q4: [69.9, 167.1)        | 0.0 (0.2)                                      |         | 1.0 (0.7, 1.3)   |         |
| <b>Peripheral Vascular Measure</b>        |                          |                                                |         |                  |         |
| Ankle-brachial index                      | <0.9                     | 0.0 (0.2)                                      | .7      | 1.1 (0.9, 1.4)   | .03     |
|                                           | 0.9-1.09                 | Ref                                            |         | Ref              |         |
|                                           | 1.1-1.39                 | 0.1 (0.1)                                      |         | 1.1 (0.9, 1.3)   |         |
|                                           | ≥1.4                     | -0.2 (0.3)                                     |         | 1.7 (1.2, 2.5)   |         |
| <b>Measure of Anemia</b>                  |                          |                                                |         |                  |         |
| Hemoglobin,<br>mg/dL                      | M: <12, F: <11           | -0.2 (0.1)                                     | .2      | 1.1 (0.9, 1.3)   | .1      |
|                                           | M: 12-13.9, F: 11-12.9   | Ref                                            |         | Ref              |         |
|                                           | M: ≥14, F: ≥13           | 0.2 (0.2)                                      |         | 0.9 (0.7, 1.1)   |         |
| <b>Inflammatory Marker and Chemokines</b> |                          |                                                |         |                  |         |
| hsCRP,<br>mg/L                            | Q1: [0.1, 1.0)           | Ref                                            | .3      | Ref              | .4      |
|                                           | Q2: [1.0, 2.5)           | 0.1 (0.2)                                      |         | 0.9 (0.7, 1.1)   |         |
|                                           | Q3: [2.5, 6.3)           | 0.3 (0.2)                                      |         | 0.8 (0.7, 1.0)   |         |

|                                            |                       | With Diabetes                                  |         |                  |         |
|--------------------------------------------|-----------------------|------------------------------------------------|---------|------------------|---------|
|                                            |                       | eGFR Slope,<br>mL/min/1.73m <sup>2</sup> /year |         | KRT/eGFR Halving |         |
|                                            |                       | Beta Coefficient <sup>a</sup><br>(SE)          | P value | HR (95% CI)      | P value |
|                                            | Q4: [6.3, 187)        | 0.2 (0.2)                                      |         | 0.9 (0.7, 1.1)   |         |
| Serum<br>fractalkine<br>(CX3CL1),<br>pg/mL | Q1: [0.1, 0.6)        | Ref                                            | .01     | Ref              | .05     |
|                                            | Q2: [0.6, 0.8)        | 0.1 (0.2)                                      |         | 1.0 (0.7, 1.3)   |         |
|                                            | Q3: [0.8, 1.1)        | -0.4 (0.2)                                     |         | 1.2 (0.9, 1.6)   |         |
|                                            | Q4: [1.1, 3.6]        | -0.4 (0.2)                                     |         | 1.3 (1.0, 1.7)   |         |
| Plasma<br>CXCL12,<br>pg/mL                 | Q1: [832.1, 2066.4)   | Ref                                            | .3      | Ref              | <.001   |
|                                            | Q2: [2066.4, 2410.5)  | -0.1 (0.2)                                     |         | 1.2 (0.9, 1.6)   |         |
|                                            | Q3: [2410.5, 2797.8)  | -0.3 (0.2)                                     |         | 1.5 (1.2, 2.0)   |         |
|                                            | Q4: [2797.8, 6173.3]  | -0.3 (0.2)                                     |         | 1.7 (1.4, 2.2)   |         |
| <b>Mineral Metabolism Markers</b>          |                       |                                                |         |                  |         |
| FGF23,<br>RU/mL                            | Q1: [1.4, 94.1)       | Ref                                            | .6      | Ref              | <.001   |
|                                            | Q2: [94.1, 139.1)     | -0.2 (0.2)                                     |         | 1.2 (0.9, 1.6)   |         |
|                                            | Q3: [139.1, 225.5)    | -0.1 (0.2)                                     |         | 1.6 (1.2, 2.1)   |         |
|                                            | Q4: [225.5, 14 318.9] | -0.3 (0.2)                                     |         | 1.8 (1.3, 2.5)   |         |
| Serum<br>phosphate,<br>mg/dL               | Q1: [1.7, 3.3)        | 0.0 (0.2)                                      | .9      | 0.9 (0.7, 1.1)   | .2      |
|                                            | Q2: [3.3, 3.7)        | Ref                                            |         | Ref              |         |
|                                            | Q3: [3.7, 4.1)        | 0.0 (0.2)                                      |         | 1.0 (0.8, 1.2)   |         |
|                                            | Q4: [4.1, 9.3]        | 0.1 (0.2)                                      |         | 1.1 (0.9, 1.4)   |         |
| Intact PTH<br>pg/mL                        | Q1: [1.9, 34.1)       | 0.2 (0.2)                                      | .2      | 1.1 (0.9, 1.5)   | .06     |
|                                            | Q2: [34.1, 52.4)      | Ref                                            |         | Ref              |         |
|                                            | Q3: [52.4, 84.7)      | -0.1 (0.2)                                     |         | 1.1 (0.9, 1.4)   |         |
|                                            | Q4: [84.5, 1483]      | -.1 (0.2)                                      |         | 1.4 (1.1, 1.7)   |         |
| <b>Carbohydrate Metabolism Markers</b>     |                       |                                                |         |                  |         |
| HbA1c,<br>%                                | Q1: [3.5, 5.6)        | Ref                                            | .3      | Ref              | .1      |
|                                            | Q2: [5.6, 6.2)        | 0.2 (0.3)                                      |         | 1.3 (0.9, 2.1)   |         |
|                                            | Q3: [6.2, 7.3)        | 0.2 (0.3)                                      |         | 1.0 (0.6, 1.4)   |         |
|                                            | Q4: [7.3, 15.2]       | 0.0 (0.3)                                      |         | 1.0 (0.7, 1.6)   |         |
| HOMA-IR                                    | Q1: [0, 2.5)          | Ref                                            | .8      | Ref              | .3      |
|                                            | Q2: [2.5, 4.1)        | 0.1 (0.2)                                      |         | 0.8 (0.6, 1.0)   |         |
|                                            | Q3: [4.1, 7.2)        | 0.1 (0.2)                                      |         | 0.9 (0.6, 1.1)   |         |
|                                            | Q4: [7.2, 224.8)      | 0.2 (0.2)                                      |         | 0.8 (0.6, 1.0)   |         |

|                                 |                       | With Diabetes                                  |         |                  |         |
|---------------------------------|-----------------------|------------------------------------------------|---------|------------------|---------|
|                                 |                       | eGFR Slope,<br>mL/min/1.73m <sup>2</sup> /year |         | KRT/eGFR Halving |         |
|                                 |                       | Beta Coefficient <sup>a</sup><br>(SE)          | P value | HR (95% CI)      | P value |
| hsTnT,<br>pg/mL                 | Q1: [1.5, 5.5)        | Ref                                            | .2      | Ref              | <.001   |
|                                 | Q2: [5.5, 11.4)       | -0.2 (0.2)                                     |         | 1.1 (0.8, 1.6)   |         |
|                                 | Q3: (11.4, 22.2)      | -0.2 (0.2)                                     |         | 1.3 (0.9, 1.8)   |         |
|                                 | Q4: (22.2, 738.7)     | -0.4 (0.2)                                     |         | 1.8 (1.3, 2.6)   |         |
| NTproBNP,<br>pg/mL              | Q1: [2.5, 60.2)       | Ref                                            | <.001   | Ref              | <.001   |
|                                 | Q2: [60.2, 139.4)     | -0.5 (0.2)                                     |         | 1.5 (1.1, 2.0)   |         |
|                                 | Q3: [139.4, 366.6)    | -0.5 (0.2)                                     |         | 1.6 (1.2, 2.1)   |         |
|                                 | Q4: [366.6, 33 742]   | -0.8 (0.2)                                     |         | 2.1 (1.6, 2.8)   |         |
| Serum<br>bicarbonate,<br>mmol/L | ≤22                   | 0.1 (0.2)                                      | .5      | 0.9 (0.7, 1.1)   | .7      |
|                                 | (22, 24]              | Ref                                            |         | Ref              |         |
|                                 | (24, 26]              | 0.1 (0.2)                                      |         | 0.9 (0.7, 1.1)   |         |
|                                 | >26                   | 0.3 (0.2)                                      |         | 0.9 (0.7, 1.1)   |         |
| Urine<br>sodium,<br>mEq/24h     | Q1: [4.3, 108.6)      | Ref                                            | .2      | Ref              | .7      |
|                                 | Q2: [108.6, 151.3)    | 0.0 (0.2)                                      |         | 1.0 (0.8, 1.2)   |         |
|                                 | Q3: [151.3, 203.1)    | 0.3 (0.2)                                      |         | 0.9 (0.8, 1.2)   |         |
|                                 | Q4: [203.1, 699.8]    | 0.2 (0.2)                                      |         | 0.9 (0.7, 1.1)   |         |
| Urine<br>potassium,<br>mmol/24h | Q1: [3.0, 37.5)       | Ref                                            | .2      | Ref              | .1      |
|                                 | Q2: [37.5, 51.8)      | 0.0 (0.2)                                      |         | 0.8 (0.7, 1.0)   |         |
|                                 | Q3: [51.8, 69.4)      | 0.2 (0.2)                                      |         | 0.8 (0.6, 1.0)   |         |
|                                 | Q4: [69.4, 417.7]     | 0.3 (0.2)                                      |         | 0.8 (0.6, 1.0)   |         |
| Urine NGAL,<br>ng/ml            | Q1: [0.4, 6.3)        | Ref                                            | <.001   | Ref              | <.001   |
|                                 | Q2: [6.3, 14.2)       | -0.4 (0.2)                                     |         | 1.2 (0.9, 1.6)   |         |
|                                 | Q3: [14.2, 32.9)      | -0.6 (0.2)                                     |         | 1.3 (1.0, 1.7)   |         |
|                                 | Q4: [32.9, 2743.8]    | -0.8 (0.2)                                     |         | 2.3 (1.7, 2.9)   |         |
| Serum<br>aldosterone,<br>pg/mL  | Q1: [0.8, 71.2)       | Ref                                            | .8      | Ref              | .2      |
|                                 | Q2: [71.2, 101.4)     | 0.1 (0.2)                                      |         | 0.9 (0.7, 1.1)   |         |
|                                 | Q3: [101.4, 152.8)    | 0.2 (0.2)                                      |         | 0.9 (0.7, 1.1)   |         |
|                                 | Q4: [152.8, 15 630.9] | 0.1 (0.2)                                      |         | 1.1 (0.9, 1.4)   |         |

Abbreviations: ACE: angiotensin converting enzyme; ARB: angiotensin receptor blocker; BP: blood pressure; CI: confidence interval; CKD: chronic kidney disease; CVD: cardiovascular disease; eGFR: estimated glomerular filtration rate; KRT: kidney replacement therapy; FGF23: fibroblast growth factor-23; HR: hazard ratio; hsCRP: high-sensitivity C-reactive protein; hsTnT: high-sensitivity troponin T; NGAL: neutrophil gelatinase-associated lipocalin; NH: non-Hispanic; NTproBNP: N-terminal pro-B-type natriuretic peptide; PTH: parathyroid hormone; RAAS: renin-angiotensin-aldosterone system; Ref: reference; SE: standard error; UACR: urine albumin:creatinine ratio

SI conversion: To convert Uric acid to  $\mu\text{mol/L}$ , multiply by 59.485. To convert Hemoglobin to  $\text{g/L}$ , multiply by 0.01. To convert hsCRP to  $\text{nmol/L}$ , multiply by 9.524. To convert serum phosphate to  $\text{mmol/L}$ , multiply by 0.323. For serum bicarbonate, 1  $\text{mEq/L}$  is equivalent to 1  $\text{mmol/L}$ . For urine potassium, 1  $\text{mEq/24h}$  is equivalent to 1  $\text{mmol/d}$ . To convert serum aldosterone to  $\text{pmol/L}$ , multiply by 2.774.

<sup>a</sup> Negative coefficients represent a faster decline in eGFR compared to the reference group.

**Table S2a. Final multivariable-adjusted models of chronic kidney disease progression among CRIC participants without diabetes after exclusion of albuminuria**

|                                                    |                           | Without Diabetes                               |         |                                             |                      |               |
|----------------------------------------------------|---------------------------|------------------------------------------------|---------|---------------------------------------------|----------------------|---------------|
|                                                    |                           | eGFR Slope,<br>mL/min/1.73m <sup>2</sup> /year |         | KRT/eGFR Halving                            |                      |               |
|                                                    |                           | Beta Coefficient <sup>a</sup><br>(SE)          | P value | HR (95% CI) <sup>b</sup>                    | P value <sup>b</sup> |               |
| <b>Demographic Factors</b>                         |                           |                                                |         |                                             |                      |               |
| Age,<br>years                                      | <45                       | -0.7 (0.1)                                     | <.001   | Y0-6: 2.4 (1.7, 3.4)                        | Y0-6:<br><.001       |               |
|                                                    |                           |                                                |         | Y6+: 2.4 (1.4, 3.9)                         |                      |               |
|                                                    | 45-64                     | Ref                                            |         | Ref                                         |                      |               |
|                                                    | 65-75                     | 0.1 (0.1)                                      |         | Y0-6: 0.7 (0.5, 1.0)<br>Y6+: 0.8 (0.5, 1.3) |                      | Y6+:<br><.001 |
| Gender                                             | Male                      | Ref                                            | <.001   | Ref                                         | <.001                |               |
|                                                    | Female                    | 0.8 (0.1)                                      |         | 0.4 (0.3, 0.5)                              |                      |               |
| Race/<br>ethnicity                                 | NH-White                  | Ref                                            | <.001   | Ref                                         | Y0-6:<br><.001       |               |
|                                                    | NH-Black, APOL1 low-risk  | -0.2 (0.1)                                     |         | Y0-6: 1.8 (1.3, 2.5)<br>Y6+: 1.4 (0.9, 2.1) |                      |               |
|                                                    | NH-Black, APOL1 high-risk | -0.8 (0.2)                                     |         | Y0-6: 3.7 (2.5, 5.4)<br>Y6+: 1.3 (0.6, 2.5) |                      |               |
|                                                    | Hispanic                  | 0.0 (0.2)                                      |         | Y0-6: 1.3 (0.8, 2.1)<br>Y6+: 1.9 (1.0, 3.8) |                      | Y6+:<br>.07   |
|                                                    | Other                     | -0.7 (0.2)                                     |         | Y0-6: 3.3 (1.9, 5.9)<br>Y6+: 3.0 (1.2, 7.8) |                      |               |
| <b>Kidney Function Measures</b>                    |                           |                                                |         |                                             |                      |               |
| Baseline<br>eGFR,<br>mL/min/<br>1.73m <sup>2</sup> | <30                       | 0.1 (0.2)                                      | <.001   | 1.7 (1.3, 2.2)                              | <.001                |               |
|                                                    | 30-44.9                   | Ref                                            |         | Ref                                         |                      |               |
|                                                    | 45-59.9                   | 0.2 (0.1)                                      |         | 0.5 (0.4, 0.6)                              |                      |               |
|                                                    | ≥60                       | 0.7 (0.1)                                      |         | 0.2 (0.1, 0.3)                              |                      |               |
| <b>Blood Pressure Factors</b>                      |                           |                                                |         |                                             |                      |               |
| Systolic BP,<br>mmHg                               | <120                      | Ref                                            | <.001   | Ref                                         | <.001                |               |
|                                                    | 120-139                   | -0.3 (0.1)                                     |         | 1.4 (1.1, 1.8)                              |                      |               |
|                                                    | ≥140                      | -0.8 (0.1)                                     |         | 2.0 (1.5, 2.7)                              |                      |               |
| ACE/ARB                                            | No                        | -                                              | -       | Ref                                         | .01                  |               |

|                                   |                        | Without Diabetes                               |         |                                             |                                 |
|-----------------------------------|------------------------|------------------------------------------------|---------|---------------------------------------------|---------------------------------|
|                                   |                        | eGFR Slope,<br>mL/min/1.73m <sup>2</sup> /year |         | KRT/eGFR Halving                            |                                 |
|                                   |                        | Beta Coefficient <sup>a</sup><br>(SE)          | P value | HR (95% CI) <sup>b</sup>                    | P value <sup>b</sup>            |
|                                   | Yes                    | -                                              |         | 1.3 (1.1, 1.7)                              |                                 |
| <b>Behavioral Factor</b>          |                        |                                                |         |                                             |                                 |
| Current smoker                    | No                     | -                                              | -       | Ref                                         | .08                             |
|                                   | Yes                    | -                                              |         | 1.3 (1.0, 1.8)                              |                                 |
| <b>Body Composition Measures</b>  |                        |                                                |         |                                             |                                 |
| Fat-free mass, kg                 | Q1: [25.8, 49.1)       | Ref                                            | .04     | Ref                                         | .01                             |
|                                   | Q2: [49.1, 59.1)       | 0.3 (0.1)                                      |         | 0.7 (0.5, 0.9)                              |                                 |
|                                   | Q3: [59.1, 69.9)       | 0.3 (0.2)                                      |         | 0.8 (0.5, 1.1)                              |                                 |
|                                   | Q4: [69.9, 167.1)      | 0.1 (0.2)                                      |         | 1.0 (0.7, 1.5)                              |                                 |
| <b>Measure of Anemia</b>          |                        |                                                |         |                                             |                                 |
| Hemoglobin, mg/dL                 | M: <12, F: <11         | -                                              | -       | Y0-6: 1.2 (0.9, 1.6)<br>Y6+: 0.9 (0.5, 1.4) | Y0-6:<br>.2                     |
|                                   | M: 12-13.9, F: 11-12.9 | -                                              |         | Ref                                         |                                 |
|                                   | M: ≥14, F: ≥13         | -                                              |         | Y0-6: 0.8 (0.6, 1.2)<br>Y6+: 0.5 (0.3, 0.8) | Y6+:<br>.008                    |
| <b>Mineral Metabolism Markers</b> |                        |                                                |         |                                             |                                 |
| FGF23, RU/mL                      | Q1: [1.4, 94.1)        | -                                              | -       | Ref                                         | .03                             |
|                                   | Q2: [94.1, 139.1)      | -                                              |         | 1.3 (1.0, 1.9)                              |                                 |
|                                   | Q3: [139.1, 225.5)     | -                                              |         | 1.6 (1.1, 2.2)                              |                                 |
|                                   | Q4: [225.5, 14 318.9]  | -                                              |         | 1.7 (1.2, 2.4)                              |                                 |
| <b>Cardiac Markers</b>            |                        |                                                |         |                                             |                                 |
| NTproBNP, pg/mL                   | Q1: [2.5, 60.2)        | Ref                                            | .009    | Ref                                         | Y0-6:<br>.002<br><br>Y6+:<br>.3 |
|                                   | Q2: [60.2, 139.4)      | -0.2 (0.1)                                     |         | Y0-6: 1.6 (1.1, 2.5)<br>Y6+: 0.8 (0.5, 1.4) |                                 |
|                                   | Q3: [139.4, 366.6)     | -0.5 (0.1)                                     |         | Y0-6: 2.2 (1.4, 3.4)<br>Y6+: 1.3 (0.8, 2.2) |                                 |
|                                   | Q4: [366.6, 33 742]    | -0.4 (0.2)                                     |         | Y0-6: 2.2 (1.4, 3.5)<br>Y6+: 1.2 (0.7, 2.1) |                                 |
| <b>Acidosis Marker</b>            |                        |                                                |         |                                             |                                 |
|                                   | ≤22                    | -                                              | -       | 1.7 (1.3, 2.3)                              | .003                            |
|                                   | (22, 24]               | -                                              |         | Ref                                         |                                 |

|                             |                    | Without Diabetes                               |         |                          |                      |
|-----------------------------|--------------------|------------------------------------------------|---------|--------------------------|----------------------|
|                             |                    | eGFR Slope,<br>mL/min/1.73m <sup>2</sup> /year |         | KRT/eGFR Halving         |                      |
|                             |                    | Beta Coefficient <sup>a</sup><br>(SE)          | P value | HR (95% CI) <sup>b</sup> | P value <sup>b</sup> |
| Serum bicarbonate, mmol/L   | (24, 26]           | -                                              |         | 1.3 (0.9, 1.8)           |                      |
|                             | >26                | -                                              |         | 1.3 (0.9, 1.8)           |                      |
| <b>Urinary Electrolytes</b> |                    |                                                |         |                          |                      |
| Urine potassium, mmol/24h   | Q1: [3.0, 37.5)    | Ref                                            | .04     | -                        | -                    |
|                             | Q2: [37.5, 51.8)   | -0.1 (0.1)                                     |         | -                        |                      |
|                             | Q3: [51.8, 69.4)   | -0.3 (0.1)                                     |         | -                        |                      |
|                             | Q4: [69.4, 417.7]  | 0.0 (0.1)                                      |         | -                        |                      |
| <b>Kidney Injury Marker</b> |                    |                                                |         |                          |                      |
| Urine NGAL, ng/ml           | Q1: [0.4, 6.3)     | Ref                                            | <.001   | Ref                      | <.001                |
|                             | Q2: [6.3, 14.2)    | -0.4 (0.1)                                     |         | 2.0 (1.4, 2.9)           |                      |
|                             | Q3: [14.2, 32.9)   | -0.5 (0.1)                                     |         | 2.0 (1.4, 2.9)           |                      |
|                             | Q4: [32.9, 2743.8] | -0.7 (0.2)                                     |         | 2.7 (1.8, 4.0)           |                      |

Abbreviations: ACE: angiotensin converting enzyme; ARB: angiotensin receptor blocker; BP: blood pressure; CI: confidence interval; CKD: chronic kidney disease; eGFR: estimated glomerular filtration rate; KRT: kidney replacement therapy; FGF23: fibroblast growth factor-23; HR: hazard ratio; NGAL: neutrophil gelatinase-associated lipocalin; NH: non-Hispanic; NTproBNP: N-terminal pro-B-type natriuretic peptide; Ref: reference; SE: standard error

SI conversion: To convert Uric acid to  $\mu\text{mol/L}$ , multiply by 59.485. To convert Hemoglobin to g/L, multiply by 0.01. To convert serum phosphate to mmol/L, multiply by 0.323. For serum bicarbonate, 1 mEq/L is equivalent to 1 mmol/L. For urine potassium, 1 mEq/24h is equivalent to 1 mmol/d.

<sup>a</sup> Negative coefficients represent a faster decline in eGFR compared to the reference group.

<sup>b</sup> HRs and p-values for factors with significant interactions with time are depicted separately for years 0 through 6 (Y0-6) and 6+ years (Y6+).



**Table S2b. Final multivariable-adjusted models of chronic kidney disease progression among CRIC participants with diabetes after exclusion of albuminuria**

|                                                    |                           | With Diabetes                                  |         |                                             |                                    |
|----------------------------------------------------|---------------------------|------------------------------------------------|---------|---------------------------------------------|------------------------------------|
|                                                    |                           | eGFR Slope,<br>mL/min/1.73m <sup>2</sup> /year |         | KRT/eGFR Halving                            |                                    |
|                                                    |                           | Beta Coefficient <sup>a</sup><br>(SE)          | P value | HR (95% CI) <sup>b</sup>                    | P value <sup>b</sup>               |
| <b>Demographic Factors</b>                         |                           |                                                |         |                                             |                                    |
| Age,<br>years                                      | <45                       | -1.0 (0.3)                                     | <.001   | Y0-6: 1.5 (1.1, 2.1)                        | <.001                              |
|                                                    |                           |                                                |         | Y6+: 2.5 (1.5, 4.0)                         |                                    |
|                                                    | 45-64                     | Ref                                            |         | Ref                                         |                                    |
|                                                    | 65-75                     | 0.3 (0.2)                                      |         | Y0-6: 0.6 (0.5, 0.8)<br>Y6+: 0.7 (0.5, 1.1) |                                    |
| Gender                                             | Male                      | Ref                                            | <.001   | Ref                                         | <.001                              |
|                                                    | Female                    | 0.7 (0.2)                                      |         | 0.6 (0.5, 0.7)                              |                                    |
| Race/<br>ethnicity                                 | NH-White                  | Ref                                            | <.001   | Ref                                         | <.001                              |
|                                                    | NH-Black, APOL1 low-risk  | -0.4 (0.2)                                     |         | 1.3 (1.0, 1.6)                              |                                    |
|                                                    | NH-Black, APOL1 high-risk | -1.5 (0.3)                                     |         | 1.8 (1.3, 2.5)                              |                                    |
|                                                    | Hispanic                  | -0.8 (0.2)                                     |         | 1.7 (1.2, 2.2)                              |                                    |
|                                                    | Other                     | -0.5 (0.3)                                     |         | 1.5 (1.0, 2.2)                              |                                    |
| <b>Kidney Function Measure</b>                     |                           |                                                |         |                                             |                                    |
| Baseline<br>eGFR,<br>mL/min/<br>1.73m <sup>2</sup> | <30                       | 0.6 (0.2)                                      | <.001   | Y0-6: 1.4 (1.1, 1.8)                        | Y0-6:<br><.001<br><br>Y6+:<br>.004 |
|                                                    |                           |                                                |         | Y6+: 2.1 (1.3, 3.4)                         |                                    |
|                                                    | 30-44.9                   | Ref                                            |         | Ref                                         |                                    |
|                                                    | 45-59.9                   | -0.4 (0.2)                                     |         | Y0-6: 0.7 (0.5, 0.9)<br>Y6+: 0.8 (0.5, 1.2) |                                    |
|                                                    | ≥60                       | -0.6 (0.2)                                     |         | Y0-6: 0.5 (0.3, 0.8)                        |                                    |
|                                                    |                           |                                                |         | Y6+: 0.8 (0.5, 1.5)                         |                                    |
| <b>Blood Pressure Factor</b>                       |                           |                                                |         |                                             |                                    |
| Systolic BP,<br>mmHg                               | < 120                     | Ref                                            | <.001   | Ref                                         | <.001                              |
|                                                    | 120-139                   | -0.5 (0.2)                                     |         | 1.6 (1.3, 2.0)                              |                                    |
|                                                    | ≥ 140                     | -1.2 (0.2)                                     |         | 2.4 (1.9, 3.0)                              |                                    |
| <b>Clinical Factors</b>                            |                           |                                                |         |                                             |                                    |
| History of<br>CVD                                  | No                        | -                                              | -       | Ref                                         | .04                                |
|                                                    | Yes                       | -                                              |         | 1.2 (1.0, 1.4)                              |                                    |

|                                           |                      | With Diabetes                                  |         |                          |                      |
|-------------------------------------------|----------------------|------------------------------------------------|---------|--------------------------|----------------------|
|                                           |                      | eGFR Slope,<br>mL/min/1.73m <sup>2</sup> /year |         | KRT/eGFR Halving         |                      |
|                                           |                      | Beta Coefficient <sup>a</sup><br>(SE)          | P value | HR (95% CI) <sup>b</sup> | P value <sup>b</sup> |
| <b>Behavioral Factor</b>                  |                      |                                                |         |                          |                      |
| Current smoker                            | No                   | Ref                                            | .07     | Ref                      | .03                  |
|                                           | Yes                  | -0.4 (0.2)                                     |         | 1.3 (1.0, 1.7)           |                      |
| <b>Inflammatory Marker and Chemokines</b> |                      |                                                |         |                          |                      |
| Serum fractalkine (CX3CL1), pg/mL         | Q1: [0.1, 0.6)       | Ref                                            | <.001   | Ref                      | <.001                |
|                                           | Q2: [0.6, 0.8)       | -0.2 (0.2)                                     |         | 1.3 (1.0, 1.9)           |                      |
|                                           | Q3: [0.8, 1.1)       | -0.7 (0.2)                                     |         | 1.8 (1.3, 2.4)           |                      |
|                                           | Q4: [1.1, 3.6]       | -0.7 (0.2)                                     |         | 1.9 (1.4, 2.5)           |                      |
| Plasma CXCL12, pg/mL                      | Q1: [832.1, 2066.4)  | -                                              | -       | Ref                      | Y0-6: .02<br>Y6+: .3 |
|                                           | Q2: [2066.4, 2410.5) | -                                              |         | Y0-6: 1.2 (0.9, 1.7)     |                      |
|                                           | Q3: [2410.5, 2797.8) | -                                              |         | Y6+: 1.2 (0.7, 2.0)      |                      |
|                                           | Q4: [2797.8, 6173.3] | -                                              |         | Y0-6: 1.6 (1.2, 2.2)     |                      |
|                                           |                      | -                                              |         | Y6+: 0.9 (0.5, 1.5)      |                      |
|                                           | -                    | Y0-6: 1.4 (1.0, 1.9)                           |         |                          |                      |
|                                           | -                    | Y6+: 1.4 (0.8, 2.2)                            |         |                          |                      |
| <b>Mineral Metabolism Markers</b>         |                      |                                                |         |                          |                      |
| Intact PTH pg/mL                          | Q1: [1.9, 34.1)      | 0.3 (0.2)                                      | .08.    | 1.1 (0.8, 1.5)           | .05                  |
|                                           | Q2: [34.1, 52.4)     | Ref                                            |         | Ref                      |                      |
|                                           | Q3: [52.4, 84.7)     | -0.1 (0.2)                                     |         | 1.1 (0.9, 1.5)           |                      |
|                                           | Q4: [84.5, 1483]     | -0.2 (0.2)                                     |         | 1.4 (1.1, 1.8)           |                      |
| <b>Carbohydrate Metabolism Markers</b>    |                      |                                                |         |                          |                      |
| HbA1c, %                                  | Q1: [3.5, 5.6)       | Ref                                            | .003    | -                        | -                    |
|                                           | Q2: [5.6, 6.2)       | 0.5 (0.4)                                      |         | -                        |                      |
|                                           | Q3: [6.2, 7.3)       | 0.2 (0.3)                                      |         | -                        |                      |
|                                           | Q4: [7.3, 15.2]      | -0.2 (0.3)                                     |         | -                        |                      |
| <b>Cardiac Markers</b>                    |                      |                                                |         |                          |                      |
| hsTnT, pg/mL                              | Q1: [1.5, 5.5)       | -                                              | -       | Ref                      | .009                 |
|                                           | Q2: [5.5, 11.4)      | -                                              |         | 1.1 (0.7, 1.6)           |                      |
|                                           | Q3: (11.4, 22.2)     | -                                              |         | 1.4 (0.9, 2.0)           |                      |
|                                           | Q4: (22.2, 738.7)    | -                                              |         | 1.7 (1.1, 2.5)           |                      |

|                                 |                     | With Diabetes                                  |                      |                          |                                   |
|---------------------------------|---------------------|------------------------------------------------|----------------------|--------------------------|-----------------------------------|
|                                 |                     | eGFR Slope,<br>mL/min/1.73m <sup>2</sup> /year |                      | KRT/eGFR Halving         |                                   |
|                                 |                     | Beta Coefficient <sup>a</sup><br>(SE)          | P value              | HR (95% CI) <sup>b</sup> | P value <sup>b</sup>              |
| NTproBNP,<br>pg/mL              | Q1: [2.5, 60.2)     | Ref                                            | <.001                | Ref                      | Y0-6:<br><.001<br><br>Y6+:<br>.4  |
|                                 | Q2: [60.2, 139.4)   | -0.6 (0.2)                                     |                      | Y0-6: 1.8 (1.2, 2.7)     |                                   |
|                                 | Q3: [139.4, 366.6)  | -0.7 (0.2)                                     |                      | Y6+: 1.1 (0.6, 1.9)      |                                   |
|                                 | Q4: [366.6, 33 742] | -1.0 (0.2)                                     |                      | Y0-6: 1.7 (1.1, 2.6)     |                                   |
|                                 |                     |                                                |                      | Y6+: 1.4 (0.8, 2.3)      |                                   |
|                                 |                     |                                                | Y0-6: 2.3 (1.5, 3.4) |                          |                                   |
|                                 |                     |                                                | Y6+: 1.5 (0.9, 2.6)  |                          |                                   |
| <b>Acidosis Marker</b>          |                     |                                                |                      |                          |                                   |
| Serum<br>bicarbonate,<br>mmol/L | ≤22                 | -                                              | -                    | Y0-6: 0.8 (0.6, 1.1)     | Y0-6:<br>.05<br><br>Y6+:<br>.2    |
|                                 | (22, 24]            | -                                              |                      | Y6+: 0.6 (0.4, 1.0)      |                                   |
|                                 | (24, 26]            | -                                              |                      | Ref                      |                                   |
|                                 | >26                 | -                                              |                      | Y0-6: 1.0 (0.7, 1.3)     |                                   |
|                                 |                     |                                                |                      | Y6+: 0.9 (0.5, 1.4)      |                                   |
|                                 |                     |                                                | Y0-6: 0.7 (0.5, 0.9) |                          |                                   |
|                                 |                     |                                                | Y6+: 0.9 (0.6, 1.5)  |                          |                                   |
| <b>Kidney Injury Marker</b>     |                     |                                                |                      |                          |                                   |
| Urine NGAL,<br>ng/ml            | Q1: [0.4, 6.3)      | Ref                                            | <.001                | Ref                      | Y0-6:<br><.001<br><br>Y6+:<br>.02 |
|                                 | Q2: [6.3, 14.2)     | -0.5 (0.2)                                     |                      | Y0-6: 1.3 (0.9, 1.8)     |                                   |
|                                 | Q3: [14.2, 32.9)    | -0.8 (0.2)                                     |                      | Y6+: 1.0 (0.7, 1.7)      |                                   |
|                                 | Q4: [32.9, 2743.8]  | -1.3 (0.2)                                     |                      | Y0-6: 1.6 (1.2, 2.3)     |                                   |
|                                 |                     |                                                |                      | Y6+: 1.2 (0.8, 1.9)      |                                   |
|                                 |                     |                                                | Y0-6: 3.2 (2.3, 4.4) |                          |                                   |
|                                 |                     |                                                | Y6+: 2.0 (1.2, 3.3)  |                          |                                   |

Abbreviations: BP: blood pressure; CI: confidence interval; CKD: chronic kidney disease; CVD: cardiovascular disease; eGFR: estimated glomerular filtration rate; KRT: kidney replacement therapy; HbA1c: glycosylated hemoglobin; HR: hazard ratio; hsTnT: high-sensitivity troponin T; NGAL: neutrophil gelatinase-associated lipocalin; NH: non-Hispanic; NTproBNP: N-terminal pro-B-type natriuretic peptide; PTH: parathyroid hormone; Ref: reference; SE: standard error

N/A indicates variable was excluded from analysis for indicated outcome due to multicollinearity with the outcome measure.

SI conversion: To convert serum bicarbonate, 1 mEq/L is equivalent to 1 mmol/L.

<sup>a</sup> Negative coefficients represent a faster decline in eGFR compared to the reference group.

<sup>b</sup> HRs and p-values for factors with significant interactions with time are depicted separately for years 0 through 6 (Y0-6) and 6+ years (Y6+).

**Table S3a. Multivariable-adjusted models of chronic kidney disease progression with albuminuria interaction among CRIC participants without diabetes**

|                                                 |                                       | Without Diabetes                               |         |                                       |         |
|-------------------------------------------------|---------------------------------------|------------------------------------------------|---------|---------------------------------------|---------|
|                                                 |                                       | eGFR Slope,<br>mL/min/1.73m <sup>2</sup> /year |         | KRT/eGFR Halving                      |         |
|                                                 |                                       | Beta Coefficient <sup>a</sup><br>(SE)          | P value | Beta Coefficient <sup>b</sup><br>(SE) | P value |
| <b>Demographic Factors</b>                      |                                       |                                                |         |                                       |         |
| Gender                                          | Male                                  | Ref                                            | <.001   | Ref                                   | .004    |
|                                                 | Female                                | 0.3 (0.1)                                      |         | -1.3 (0.4)                            |         |
| Gender* UACR                                    | Male*<30 UACR                         | Ref                                            | .2      | Ref                                   | .4      |
|                                                 | Female*30-299 UACR                    | 0.0 (0.2)                                      |         | 0.7 (0.5)                             |         |
|                                                 | Female*≥300 UACR                      | 0.6 (0.3)                                      |         | 0.6 (0.5)                             |         |
| Race/ ethnicity                                 | NH-White                              | Ref                                            | <.001   | Ref                                   | .1      |
|                                                 | NH-Black, APOL1 low-risk              | 0.2 (0.1)                                      |         | 0.0 (0.4)                             |         |
|                                                 | NH-Black, APOL1 high-risk             | -0.1 (0.2)                                     |         | 0.9 (0.5)                             |         |
|                                                 | Hispanic                              | 0.2 (0.3)                                      |         | 0.9 (0.5)                             |         |
|                                                 | Other                                 | -0.3 (0.3)                                     |         | 1.1 (0.8)                             |         |
| Race/ ethnicity* UACR                           | NH-White*<30 UACR                     | Ref                                            | <.001   | Ref                                   | .4      |
|                                                 | NH-Black, APOL1 low-risk*30-299 UACR  | -0.6 (0.3)                                     |         | 0.8 (0.4)                             |         |
|                                                 | NH-Black, APOL1 high-risk*30-299 UACR | -0.8 (0.4)                                     |         | 0.7 (0.6)                             |         |
|                                                 | Hispanic*30-299 UACR                  | 0.6 (0.4)                                      |         | -0.8 (0.7)                            |         |
|                                                 | Other*30-299 UACR                     | -0.7 (0.5)                                     |         | 0.4 (0.9)                             |         |
|                                                 | NH-Black, APOL1 low-risk*≥300 UACR    | -1.1 (0.3)                                     |         | 0.6 (0.4)                             |         |
|                                                 | NH-Black, APOL1 high-risk*≥300 UACR   | -2.2 (0.5)                                     |         | 0.2 (0.6)                             |         |
|                                                 | Hispanic*≥300 UACR                    | -0.5 (0.4)                                     |         | -0.6 (0.6)                            |         |
|                                                 | Other*≥300 UACR                       | -0.3 (0.6)                                     |         | -0.2 (0.9)                            |         |
| <b>Kidney Function Measures</b>                 |                                       |                                                |         |                                       |         |
| Baseline eGFR,<br>mL/min/<br>1.73m <sup>2</sup> | <30                                   | 0.1 (0.3)                                      | .004    | 0.9 (0.4)                             | <.001   |
|                                                 | 30-44.9                               | Ref                                            |         | Ref                                   |         |
|                                                 | 45-59.9                               | 0.1 (0.2)                                      |         | -1.0 (0.4)                            |         |
|                                                 | ≥60                                   | 0.3 (0.2)                                      |         | -1.5 (0.5)                            |         |
|                                                 | 30-44.9 eGFR*<30 UACR                 | Ref                                            | .1      | Ref                                   | .6      |

|                                  |                          | Without Diabetes                               |         |                                       |         |
|----------------------------------|--------------------------|------------------------------------------------|---------|---------------------------------------|---------|
|                                  |                          | eGFR Slope,<br>mL/min/1.73m <sup>2</sup> /year |         | KRT/eGFR Halving                      |         |
|                                  |                          | Beta Coefficient <sup>a</sup><br>(SE)          | P value | Beta Coefficient <sup>b</sup><br>(SE) | P value |
| Baseline<br>eGFR*UACR            | <30 eGFR*30-299 UACR     | 0.1 (0.4)                                      |         | -0.4 (0.5)                            |         |
|                                  | 45-59.9 eGFR*30-299 UACR | -0.1 (0.3)                                     |         | 0.3 (0.5)                             |         |
|                                  | ≥60 eGFR*30-299 UACR     | 0.1 (0.3)                                      |         | 0.1 (0.7)                             |         |
|                                  | <30 eGFR*≥300 UACR       | 0.5 (0.4)                                      |         | -0.3 (0.4)                            |         |
|                                  | 45-59.9 eGFR*≥300 UACR   | -0.8 (0.3)                                     |         | 0.6 (0.4)                             |         |
|                                  | ≥60 eGFR*≥300 UACR       | 0.0 (0.5)                                      |         | -0.4 (0.8)                            |         |
| UACR,<br>mg/g                    | <30                      | Ref                                            | <.001   | Ref                                   | .2      |
|                                  | 30-299                   | -0.3 (0.5)                                     |         | 1.7 (0.9)                             |         |
|                                  | ≥300                     | 0.6 (0.6)                                      |         | 1.5 (0.9)                             |         |
| <b>Blood Pressure Factors</b>    |                          |                                                |         |                                       |         |
| Systolic BP,<br>mmHg             | <120                     | Ref                                            | <.001   | Ref                                   | .2      |
|                                  | 120-139                  | -0.1 (0.1)                                     |         | 0.3 (0.3)                             |         |
|                                  | ≥140                     | -0.4 (0.2)                                     |         | 0.7 (0.4)                             |         |
| Systolic BP*<br>UACR             | <120 BP*<30 UACR         | Ref                                            | .06     | Ref                                   | .04     |
|                                  | 120-139 BP*30-299 UACR   | -0.1 (0.2)                                     |         | -0.4 (0.4)                            |         |
|                                  | ≥140 BP*30-299 UACR      | 0.3 (0.3)                                      |         | -0.9 (0.5)                            |         |
|                                  | 120-139 BP*≥300 UACR     | -0.4 (0.3)                                     |         | 0.1 (0.4)                             |         |
|                                  | ≥140 BP*≥300 UACR        | -0.9 (0.4)                                     |         | 0.1 (0.5)                             |         |
| ACE/ARB                          | No                       | Ref                                            | .6      | -                                     | N/A     |
|                                  | Yes                      | 0.2 (0.1)                                      |         | -                                     |         |
| ACE/ARB* UACR                    | No*<30 UACR              | Ref                                            | .5      | -                                     | N/A     |
|                                  | Yes*30-299 UACR          | -0.2 (0.2)                                     |         | -                                     |         |
|                                  | Yes*≥300 UACR            | -0.2 (0.3)                                     |         | -                                     |         |
| <b>Body Composition Measures</b> |                          |                                                |         |                                       |         |
| Fat-free mass,<br>kg             | Q1: [25.8, 49.1)         | -                                              | N/A     | Ref                                   | .6      |
|                                  | Q2: [49.1, 59.1)         | -                                              |         | -0.4 (0.4)                            |         |
|                                  | Q3: [59.1, 69.9)         | -                                              |         | -0.6 (0.5)                            |         |
|                                  | Q4: [69.9, 167.1)        | -                                              |         | -0.7 (0.6)                            |         |
| Fat-free<br>mass*UACR            | Q1 FFM*<30 UACR          | -                                              | N/A     | Ref                                   | .1      |
|                                  | Q2 FFM*30-299 UACR       | -                                              |         | 0.3 (0.5)                             |         |

|                                   |                                               | Without Diabetes                               |         |                                       |         |
|-----------------------------------|-----------------------------------------------|------------------------------------------------|---------|---------------------------------------|---------|
|                                   |                                               | eGFR Slope,<br>mL/min/1.73m <sup>2</sup> /year |         | KRT/eGFR Halving                      |         |
|                                   |                                               | Beta Coefficient <sup>a</sup><br>(SE)          | P value | Beta Coefficient <sup>b</sup><br>(SE) | P value |
|                                   | Q3 FFM*30-299 UACR                            | -                                              |         | 0.5 (0.6)                             |         |
|                                   | Q4 FFM*30-299 UACR                            | -                                              |         | 0.5 (0.7)                             |         |
|                                   | Q2 FFM*≥300 UACR                              | -                                              |         | -0.2 (0.5)                            |         |
|                                   | Q3 FFM*≥300 UACR                              | -                                              |         | 0.2 (0.6)                             |         |
|                                   | Q4 FFM*≥300 UACR                              | -                                              |         | 1.0 (0.6)                             |         |
| <b>Measure of Anemia</b>          |                                               |                                                |         |                                       |         |
| Hemoglobin,<br>mg/dL              | M: <12, F: <11                                | -                                              | N/A     | 0.3 (0.3)                             | .05     |
|                                   | M: 12-13.9, F: 11-12.9                        | -                                              |         | Ref                                   |         |
|                                   | M: ≥14, F: ≥13                                | -                                              |         | -0.7 (0.4)                            |         |
| Hemoglobin*<br>UACR               | M: 12-13.9, F: 11-12.9<br>Hemoglobin*<30 UACR | -                                              | N/A     | Ref                                   | .03     |
|                                   | M: <12, F: <11<br>Hemoglobin *30-299<br>UACR  | -                                              |         | -0.2 (0.4)                            |         |
|                                   | M: ≥14, F: ≥13<br>Hemoglobin*30-299 UACR      | -                                              |         | -0.2 (0.5)                            |         |
|                                   | M: <12, F: <11<br>Hemoglobin*≥300 UACR        | -                                              |         | -0.2 (0.4)                            |         |
|                                   | M: ≥14, F: ≥13<br>Hemoglobin*≥300 UACR        | -                                              |         | 0.8 (0.4)                             |         |
| <b>Mineral Metabolism Markers</b> |                                               |                                                |         |                                       |         |
| Serum<br>phosphate,<br>mg/dL      | Q1: [1.7, 3.3)                                | -0.2 (0.1)                                     | .05     | -                                     | N/A     |
|                                   | Q2: [3.3, 3.7)                                | Ref                                            |         | -                                     |         |
|                                   | Q3: [3.7, 4.1)                                | 0.1 (0.2)                                      |         | -                                     |         |
|                                   | Q4: [4.1, 9.3]                                | -0.1 (0.2)                                     |         | -                                     |         |
| Serum<br>phosphate*<br>UACR       | Q2 phosphate*<30 UACR                         | Ref                                            | .3      | -                                     | N/A     |
|                                   | Q1 phosphate*30-299<br>UACR                   | -0.3 (0.3)                                     |         | -                                     |         |
|                                   | Q3 phosphate*30-299<br>UACR                   | -0.1 (0.3)                                     |         | -                                     |         |
|                                   | Q4 phosphate*30-299<br>UACR                   | 0.2 (0.3)                                      |         | -                                     |         |
|                                   | Q1 phosphate*≥300<br>UACR                     | -0.2 (0.3)                                     |         | -                                     |         |

|                        |                               | Without Diabetes                               |         |                                       |         |
|------------------------|-------------------------------|------------------------------------------------|---------|---------------------------------------|---------|
|                        |                               | eGFR Slope,<br>mL/min/1.73m <sup>2</sup> /year |         | KRT/eGFR Halving                      |         |
|                        |                               | Beta Coefficient <sup>a</sup><br>(SE)          | P value | Beta Coefficient <sup>b</sup><br>(SE) | P value |
|                        | Q3 phosphate* $\geq$ 300 UACR | -0.7 (0.4)                                     |         | -                                     |         |
|                        | Q4 phosphate* $\geq$ 300 UACR | -0.5 (0.4)                                     |         | -                                     |         |
| <b>Cardiac Markers</b> |                               |                                                |         |                                       |         |
| hsTnT,<br>pg/mL        | Q1: [1.5, 5.5)                | -                                              | N/A     | Ref                                   | .004    |
|                        | Q2: [5.5, 11.4)               | -                                              |         | 0.7 (0.4)                             |         |
|                        | Q3: (11.4, 22.2)              | -                                              |         | -0.7 (0.5)                            |         |
|                        | Q4: (22.2, 738.7)             | -                                              |         | -0.3 (0.6)                            |         |
| hsTnT*UACR             | Q1 hsTnT* $<$ 30 UACR         | -                                              | N/A     | Ref                                   | .3      |
|                        | Q2 hsTnT*30-299 UACR          | -                                              |         | -0.8 (0.5)                            |         |
|                        | Q3 hsTnT*30-299 UACR          | -                                              |         | 0.2 (0.6)                             |         |
|                        | Q4 hsTnT*30-299 UACR          | -                                              |         | 0.1 (0.7)                             |         |
|                        | Q2 hsTnT* $\geq$ 300 UACR     | -                                              |         | -0.5 (0.4)                            |         |
|                        | Q3 hsTnT* $\geq$ 300 UACR     | -                                              |         | 0.6 (0.5)                             |         |
|                        | Q4 hsTnT* $\geq$ 300 UACR     | -                                              |         | 0.3 (0.7)                             |         |
| NTproBNP,<br>pg/mL     | Q1: [2.5, 60.2)               | Ref                                            | .01     | Ref                                   | .04     |
|                        | Q2: [60.2, 139.4)             | 0.0 (0.1)                                      |         | 0.4 (0.5)                             |         |
|                        | Q3: [139.4, 366.6)            | -0.2 (0.2)                                     |         | 0.9 (0.5)                             |         |
|                        | Q4: [366.6, 33 742]           | -0.1 (0.2)                                     |         | 1.3 (0.5)                             |         |
| NTproBNP*<br>UACR      | Q1 NTproBNP* $<$ 30 UACR      | Ref                                            | .005    | Ref                                   | .03     |
|                        | Q2 NTproBNP*30-299 UACR       | -0.2 (0.3)                                     |         | -0.3 (0.5)                            |         |
|                        | Q3 NTproBNP*30-299 UACR       | -0.6 (0.3)                                     |         | -0.4 (0.5)                            |         |
|                        | Q4 NTproBNP*30-299 UACR       | -0.4 (0.4)                                     |         | -1.0 (0.6)                            |         |
|                        | Q2 NTproBNP* $\geq$ 300 UACR  | -1.0 (0.3)                                     |         | 0.4 (0.5)                             |         |
|                        | Q3 NTproBNP* $\geq$ 300 UACR  | -0.1 (0.4)                                     |         | -0.5 (0.5)                            |         |
|                        | Q4 NTproBNP* $\geq$ 300 UACR  | 0.3 (0.4)                                      |         | -1.1 (0.6)                            |         |
|                        | $\leq$ 22                     | -                                              | N/A     | 0.4 (0.4)                             | .03     |

|                             |                                   | Without Diabetes                               |         |                                       |         |
|-----------------------------|-----------------------------------|------------------------------------------------|---------|---------------------------------------|---------|
|                             |                                   | eGFR Slope,<br>mL/min/1.73m <sup>2</sup> /year |         | KRT/eGFR Halving                      |         |
|                             |                                   | Beta Coefficient <sup>a</sup><br>(SE)          | P value | Beta Coefficient <sup>b</sup><br>(SE) | P value |
| Serum bicarbonate, mmol/L   | (22, 24]                          | -                                              |         | Ref                                   |         |
|                             | (24, 26]                          | -                                              |         | -0.9 (0.5)                            |         |
|                             | >26                               | -                                              |         | -0.2 (0.4)                            |         |
| Serum bicarbonate* UACR     | ≤22 bicarbonate* <30 UACR         | -                                              | N/A     | Ref                                   | .4      |
|                             | (22, 24] bicarbonate* 30-299 UACR | -                                              |         | 0.1 (0.4)                             |         |
|                             | (24, 26] bicarbonate* 30-299 UACR | -                                              |         | 1.2 (0.6)                             |         |
|                             | >26 bicarbonate* 30-299 UACR      | -                                              |         | 0.4 (0.5)                             |         |
|                             | (22, 24] bicarbonate* ≥300 UACR   | -                                              |         | -0.2 (0.4)                            |         |
|                             | (24, 26] bicarbonate* ≥300 UACR   | -                                              |         | 0.8 (0.5)                             |         |
|                             | >26 bicarbonate* ≥300 UACR        | -                                              |         | 0.1 (0.5)                             |         |
| <b>Urinary Electrolytes</b> |                                   |                                                |         |                                       |         |
| Urine potassium, mmol/24h   | Q1: [3.0, 37.5)                   | Ref                                            | .4      | -                                     | N/A     |
|                             | Q2: [37.5, 51.8)                  | -0.1 (0.2)                                     |         | -                                     |         |
|                             | Q3: [51.8, 69.4)                  | -0.2 (0.2)                                     |         | -                                     |         |
|                             | Q4: [69.4, 417.7]                 | 0.2 (0.2)                                      |         | -                                     |         |
| Urine potassium* UACR       | Q1 potassium* <30 UACR            | Ref                                            | .2      | -                                     | N/A     |
|                             | Q2 potassium* 30-299 UACR         | 0.4 (0.3)                                      |         | -                                     |         |
|                             | Q3 potassium* 30-299 UACR         | 0.2 (0.3)                                      |         | -                                     |         |
|                             | Q4 potassium* 30-299 UACR         | 0.2 (0.3)                                      |         | -                                     |         |
|                             | Q2 potassium* ≥300 UACR           | -0.5 (0.4)                                     |         | -                                     |         |
|                             | Q3 potassium* ≥300 UACR           | -0.4 (0.4)                                     |         | -                                     |         |
|                             | Q4 potassium* ≥300 UACR           | -0.9 (0.4)                                     |         | -                                     |         |



|                                |                               | Without Diabetes                               |         |                                       |         |
|--------------------------------|-------------------------------|------------------------------------------------|---------|---------------------------------------|---------|
|                                |                               | eGFR Slope,<br>mL/min/1.73m <sup>2</sup> /year |         | KRT/eGFR Halving                      |         |
|                                |                               | Beta Coefficient <sup>a</sup><br>(SE)          | P value | Beta Coefficient <sup>b</sup><br>(SE) | P value |
| <b>Kidney Injury Marker</b>    |                               |                                                |         |                                       |         |
| Urine NGAL,<br>ng/ml           | Q1: [0.4, 6.3)                | Ref                                            | .02     | Ref                                   | .3      |
|                                | Q2: [6.3, 14.2)               | -0.2 (0.1)                                     |         | 0.7 (0.4)                             |         |
|                                | Q3: [14.2, 32.9)              | -0.2 (0.2)                                     |         | 0.4 (0.5)                             |         |
|                                | Q4: [32.9, 2743.8]            | -0.2 (0.2)                                     |         | 0.8 (0.5)                             |         |
| Urine<br>NGAL*UACR             | Q1 NGAL*<30 UACR              | Ref                                            | .09     | Ref                                   | .2      |
|                                | Q2 NGAL*30-299 UACR           | -0.1 (0.3)                                     |         | -0.4 (0.5)                            |         |
|                                | Q3 NGAL*30-299 UACR           | 0.0 (0.3)                                      |         | -0.3 (0.6)                            |         |
|                                | Q4 NGAL*30-299 UACR           | 0.3 (0.3)                                      |         | -0.9 (0.6)                            |         |
|                                | Q2 NGAL*≥300 UACR             | -0.4 (0.4)                                     |         | 0.0 (0.5)                             |         |
|                                | Q3 NGAL*≥300 UACR             | -0.6 (0.4)                                     |         | 0.2 (0.6)                             |         |
|                                | Q4 NGAL*≥300 UACR             | -1.2 (0.4)                                     |         | 0.2 (0.6)                             |         |
| <b>RAAS Marker</b>             |                               |                                                |         |                                       |         |
| Serum<br>aldosterone,<br>pg/mL | Q1: [0.8, 71.2)               | Ref                                            | .03     | -                                     | N/A     |
|                                | Q2: [71.2, 101.4)             | -0.1 (0.2)                                     |         | -                                     |         |
|                                | Q3: [101.4, 152.8)            | -0.2 (0.2)                                     |         | -                                     |         |
|                                | Q4: [152.8, 15 630.9]         | 0.2 (0.2)                                      |         | -                                     |         |
| Serum<br>aldosterone*<br>UACR  | Q1 aldosterone*<30<br>UACR    | Ref                                            | .3      | -                                     | N/A     |
|                                | Q2 aldosterone*30-299<br>UACR | -0.2 (0.3)                                     |         | -                                     |         |
|                                | Q3 aldosterone*30-299<br>UACR | 0.0 (0.3)                                      |         | -                                     |         |
|                                | Q4 aldosterone*30-299<br>UACR | -0.3 (0.3)                                     |         | -                                     |         |
|                                | Q2 aldosterone*≥300<br>UACR   | -0.8 (0.4)                                     |         | -                                     |         |
|                                | Q3 aldosterone*≥300<br>UACR   | -0.2 (0.4)                                     |         | -                                     |         |
|                                | Q4 aldosterone*≥300<br>UACR   | -0.6 (0.4)                                     |         | -                                     |         |

Abbreviations: ACE: angiotensin converting enzyme; ARB: angiotensin receptor blocker; BP: blood pressure; CKD: chronic kidney disease; eGFR: estimated glomerular filtration rate; KRT: kidney replacement therapy; FFM: fat-free mass; hsTnT: high-sensitivity troponin T; NGAL: neutrophil gelatinase-associated lipocalin; NH: non-Hispanic; NTproBNP: N-terminal pro-B-type natriuretic peptide; RAAS: renin-angiotensin-aldosterone system; Ref: reference; SE: standard error; UACR: urine albumin:creatinine ratio

N/A indicates variable was excluded from analysis for indicated outcome as only variables selected by models described in Table 2 were tested for interaction.

SI conversion: To convert Hemoglobin to g/L, multiply by 0.01. To convert serum phosphate to mmol/L, multiply by 0.323. For serum bicarbonate, 1 mEq/L is equivalent to 1 mmol/L. For urine potassium, 1 mEq/24h is equivalent to 1 mmol/d. To convert serum aldosterone to pmol/L, multiply by 2.774.

<sup>a</sup> Negative coefficients represent a faster decline in eGFR compared to the reference group.

<sup>b</sup> Coefficients are the log hazard ratio to the reference level with positive coefficients indicating increased risk of KRT/eGFR Halving compared to the reference group.

\* Indicates interaction between variables. Sum of main and interaction beta coefficients will provide estimate for given group.

**Table S3b. Multivariable-adjusted models of chronic kidney disease progression with albuminuria interaction among CRIC participants with diabetes**

|                             |                                       | With Diabetes                                  |         |                                       |         |
|-----------------------------|---------------------------------------|------------------------------------------------|---------|---------------------------------------|---------|
|                             |                                       | eGFR Slope,<br>mL/min/1.73m <sup>2</sup> /year |         | KRT/eGFR Halving                      |         |
|                             |                                       | Beta Coefficient <sup>a</sup><br>(SE)          | P value | Beta Coefficient <sup>b</sup><br>(SE) | P value |
| <b>Demographic Factors</b>  |                                       |                                                |         |                                       |         |
| Age,<br>years               | <45                                   | -0.3 (0.4)                                     | .03     | 0.1 (0.6)                             | .8      |
|                             | 45-64                                 | Ref                                            |         | Ref                                   |         |
|                             | 65-75                                 | -0.2 (0.2)                                     |         | -0.2 (0.3)                            |         |
| Age*UACR                    | 45-64 age*<30 UACR                    | Ref                                            | .2      | Ref                                   | .9      |
|                             | <45 age*30-299 UACR                   | -0.5 (0.7)                                     |         | -0.2 (0.7)                            |         |
|                             | 65-75 age*30-299 UACR                 | 0.0 (0.3)                                      |         | -0.1 (0.4)                            |         |
|                             | <45 age*≥300 UACR                     | -0.3 (0.5)                                     |         | 0.2 (0.6)                             |         |
|                             | 65-75*≥300 UACR                       | 0.8 (0.3)                                      |         | -0.1 (0.3)                            |         |
| Gender                      | Male                                  | -                                              | N/A     | Ref                                   | .5      |
|                             | Female                                | -                                              |         | -0.2 (0.3)                            |         |
| Gender*<br>UACR             | Male*<30 UACR                         | -                                              | N/A     | Ref                                   | .8      |
|                             | Female*30-299 UACR                    | -                                              |         | -0.1 (0.4)                            |         |
|                             | Female*≥300 UACR                      | -                                              |         | -0.2 (0.3)                            |         |
| Race/<br>ethnicity          | NH-White                              | Ref                                            | <.001   | Ref                                   | .4      |
|                             | NH-Black, APOL1 low-risk              | -0.1 (0.2)                                     |         | -0.1 (0.3)                            |         |
|                             | NH-Black, APOL1 high-risk             | -0.2 (0.5)                                     |         | 1.0 (0.5)                             |         |
|                             | Hispanic                              | -0.1 (0.3)                                     |         | 0.2 (0.5)                             |         |
|                             | Other                                 | -0.5 (0.5)                                     |         | 0.3 (0.6)                             |         |
| Race/<br>ethnicity*<br>UACR | NH-White*<30 UACR                     | Ref                                            | .02     | Ref                                   | .4      |
|                             | NH-Black, APOL1 low-risk*30-299 UACR  | -0.8 (0.3)                                     |         | 0.7 (0.4)                             |         |
|                             | NH-Black, APOL1 high-risk*30-299 UACR | -1.2 (0.7)                                     |         | -0.1 (0.6)                            |         |
|                             | Hispanic*30-299 UACR                  | -1.3 (0.5)                                     |         | 0.7 (0.6)                             |         |
|                             | Other*30-299 UACR                     | 0.4 (0.7)                                      |         | -0.3 (0.8)                            |         |
|                             | NH-Black, APOL1 low-risk*≥300 UACR    | -0.7 (0.3)                                     |         | 0.4 (0.4)                             |         |
|                             | NH-Black, APOL1 high-risk*≥300 UACR   | -1.1 (0.6)                                     |         | -0.5 (0.5)                            |         |

|                                          |                                 | With Diabetes                                  |         |                                       |         |
|------------------------------------------|---------------------------------|------------------------------------------------|---------|---------------------------------------|---------|
|                                          |                                 | eGFR Slope,<br>mL/min/1.73m <sup>2</sup> /year |         | KRT/eGFR Halving                      |         |
|                                          |                                 | Beta Coefficient <sup>a</sup><br>(SE)          | P value | Beta Coefficient <sup>b</sup><br>(SE) | P value |
|                                          | Hispanic* $\geq$ 300 UACR       | -0.3 (0.4)                                     |         | 0.0 (0.6)                             |         |
|                                          | Other* $\geq$ 300 UACR          | 0.3 (0.7)                                      |         | 0.2 (0.7)                             |         |
| <b>Kidney Function Measures</b>          |                                 |                                                |         |                                       |         |
| Baseline eGFR, mL/min/1.73m <sup>2</sup> | <30                             | 0.2 (0.3)                                      | <.001   | 1.2 (0.4)                             | <.001   |
|                                          | 30-44.9                         | Ref                                            |         | Ref                                   |         |
|                                          | 45-59.9                         | -0.2 (0.2)                                     |         | -0.6 (0.4)                            |         |
|                                          | $\geq$ 60                       | -0.7 (0.3)                                     |         | -0.4 (0.5)                            |         |
| Baseline eGFR*UACR                       | <30 eGFR* $<$ 30 UACR           | Ref                                            | .1      | Ref                                   | .1      |
|                                          | 30-44.9 eGFR*30-299 UACR        | 0.3 (0.5)                                      |         | -0.6 (0.4)                            |         |
|                                          | 45-59.9 eGFR*30-299 UACR        | -0.3 (0.3)                                     |         | 0.4 (0.4)                             |         |
|                                          | $\geq$ 60 eGFR*30-299 UACR      | 0.2 (0.5)                                      |         | 0.0 (0.6)                             |         |
|                                          | 30-44.9 eGFR* $\geq$ 300 UACR   | 0.9 (0.4)                                      |         | -0.9 (0.4)                            |         |
|                                          | 45-59.9 eGFR* $\geq$ 300 UACR   | -0.4 (0.4)                                     |         | 0.4 (0.4)                             |         |
|                                          | $\geq$ 60 eGFR* $\geq$ 300 UACR | -0.5 (0.5)                                     |         | -0.1 (0.6)                            |         |
| UACR, mg/g                               | <30                             | Ref                                            | <.001   | Ref                                   | .1      |
|                                          | 30-299                          | -1.2 (0.5)                                     |         | 1.7 (1.3)                             |         |
|                                          | $\geq$ 300                      | -1.5 (0.7)                                     |         | 2.4 (1.2)                             |         |
| <b>Blood Pressure Factors</b>            |                                 |                                                |         |                                       |         |
| Systolic BP, mmHg                        | <120                            | Ref                                            | .002    | Ref                                   | .005    |
|                                          | 120-139                         | -0.2 (0.2)                                     |         | 0.5 (0.3)                             |         |
|                                          | $\geq$ 140                      | -0.5 (0.3)                                     |         | 1.2 (0.4)                             |         |
| Systolic BP* UACR                        | <120 BP* $<$ 30 UACR            | Ref                                            | .1      | Ref                                   | .1      |
|                                          | 120-139 BP*30-299 UACR          | 0.3 (0.3)                                      |         | -0.6 (0.4)                            |         |
|                                          | $\geq$ 140 BP*30-299 UACR       | 0.4 (0.4)                                      |         | -1.2 (0.4)                            |         |
|                                          | 120-139 BP* $\geq$ 300 UACR     | -0.3 (0.4)                                     |         | -0.3 (0.4)                            |         |
|                                          | $\geq$ 140 BP* $\geq$ 300 UACR  | -0.8 (0.4)                                     |         | -0.7 (0.4)                            |         |
| <b>Behavioral Factor</b>                 |                                 |                                                |         |                                       |         |
| Current smoker                           | No                              | Ref                                            | .07     | -                                     | N/A     |
|                                          | Yes                             | -0.3 (0.3)                                     |         | -                                     |         |

|                                           |                        | With Diabetes                                  |         |                                       |         |
|-------------------------------------------|------------------------|------------------------------------------------|---------|---------------------------------------|---------|
|                                           |                        | eGFR Slope,<br>mL/min/1.73m <sup>2</sup> /year |         | KRT/eGFR Halving                      |         |
|                                           |                        | Beta Coefficient <sup>a</sup><br>(SE)          | P value | Beta Coefficient <sup>b</sup><br>(SE) | P value |
| Current smoker*<br>UACR                   | No* <30 UACR           | Ref                                            | .9      | -                                     | N/A     |
|                                           | Yes* 30-299 UACR       | -0.1 (0.5)                                     |         | -                                     |         |
|                                           | Yes* ≥300 UACR         | 0.0 (0.5)                                      |         | -                                     |         |
| <b>Inflammatory Marker and Chemokines</b> |                        |                                                |         |                                       |         |
| Serum fractalkine<br>(CX3CL1),<br>pg/mL   | Q1: [0.1, 0.6)         | Ref                                            | .01     | Ref                                   | .2      |
|                                           | Q2: [0.6, 0.8)         | 0.0 (0.2)                                      |         | -0.3 (0.4)                            |         |
|                                           | Q3: [0.8, 1.1)         | -0.4 (0.2)                                     |         | 0.4 (0.4)                             |         |
|                                           | Q4: [1.1, 3.6]         | -0.4 (0.3)                                     |         | 0.5 (0.4)                             |         |
| Serum fractalkine<br>(CX3CL1)*<br>UACR    | Q1 CX3CL1* <30 UACR    | Ref                                            | .6      | Ref                                   | .7      |
|                                           | Q2 CX3CL1* 30-299 UACR | 0.3 (0.4)                                      |         | 0.4 (0.5)                             |         |
|                                           | Q3 CX3CL1* 30-299 UACR | 0.3 (0.4)                                      |         | 0.0 (0.5)                             |         |
|                                           | Q4 CX3CL1* 30-299 UACR | 0.5 (0.4)                                      |         | -0.4 (0.5)                            |         |
|                                           | Q2 CX3CL1* ≥300 UACR   | 0.3 (0.5)                                      |         | 0.2 (0.5)                             |         |
|                                           | Q3 CX3CL1* ≥300 UACR   | -0.2 (0.5)                                     |         | -0.2 (0.5)                            |         |
|                                           | Q4 CX3CL1* ≥300 UACR   | 0.4 (0.5)                                      |         | -0.4 (0.4)                            |         |
| Plasma CXCL12,<br>pg/mL                   | Q1: [832.1, 2066.4)    | -                                              | N/A     | Ref                                   | .3      |
|                                           | Q2: [2066.4, 2410.5)   | -                                              |         | 0.1 (0.4)                             |         |
|                                           | Q3: [2410.5, 2797.8)   | -                                              |         | 0.5 (0.5)                             |         |
|                                           | Q4: [2797.8, 6173.3]   | -                                              |         | 0.7 (0.4)                             |         |
| Plasma CXCL12*<br>UACR                    | Q1 CXCL12* <30 UACR    | -                                              | N/A     | Ref                                   | .6      |
|                                           | Q2 CXCL12* 30-299 UACR | -                                              |         | -0.3 (0.5)                            |         |
|                                           | Q3 CXCL12* 30-299 UACR | -                                              |         | -0.5 (0.5)                            |         |
|                                           | Q4 CXCL12* 30-299 UACR | -                                              |         | -0.5 (0.5)                            |         |
|                                           | Q2 CXCL12* ≥300 UACR   | -                                              |         | 0.3 (0.5)                             |         |
|                                           | Q3 CXCL12* ≥300 UACR   | -                                              |         | 0.0 (0.5)                             |         |
|                                           | Q4 CXCL12* ≥300 UACR   | -                                              |         | -0.2 (0.5)                            |         |
| <b>Carbohydrate Metabolism Markers</b>    |                        |                                                |         |                                       |         |
| HbA1c,<br>%                               | Q1: [3.5, 5.6)         | -                                              | N/A     | Ref                                   | .6      |
|                                           | Q2: [5.6, 6.2)         | -                                              |         | 0.7 (0.8)                             |         |
|                                           | Q3: [6.2, 7.3)         | -                                              |         | 0.2 (0.8)                             |         |
|                                           | Q4: [7.3, 15.2]        | -                                              |         | 0.6 (0.8)                             |         |

|                             |                         | With Diabetes                                  |         |                                       |         |
|-----------------------------|-------------------------|------------------------------------------------|---------|---------------------------------------|---------|
|                             |                         | eGFR Slope,<br>mL/min/1.73m <sup>2</sup> /year |         | KRT/eGFR Halving                      |         |
|                             |                         | Beta Coefficient <sup>a</sup><br>(SE)          | P value | Beta Coefficient <sup>b</sup><br>(SE) | P value |
| HbA1c*<br>UACR              | Q1 HbA1c*<30 UACR       | -                                              | N/A     | Ref                                   | .9      |
|                             | Q2 HbA1c*30-299 UACR    | -                                              |         | 0.0 (1.0)                             |         |
|                             | Q3 HbA1c*30-299 UACR    | -                                              |         | 0.1 (1.0)                             |         |
|                             | Q4 HbA1c*30-299 UACR    | -                                              |         | -0.1 (0.9)                            |         |
|                             | Q2 HbA1c*≥300 UACR      | -                                              |         | -0.3 (0.8)                            |         |
|                             | Q3 HbA1c*≥300 UACR      | -                                              |         | -0.3 (0.8)                            |         |
|                             | Q4 HbA1c*≥300 UACR      | -                                              |         | -0.6 (0.8)                            |         |
| <b>Cardiac Markers</b>      |                         |                                                |         |                                       |         |
| NTproBNP,<br>pg/mL          | Q1: [2.5, 60.2)         | Ref                                            | .01     | Ref                                   | .04     |
|                             | Q2: [60.2, 139.4)       | -0.5 (0.2)                                     |         | 0.9 (0.5)                             |         |
|                             | Q3: [139.4, 366.6)      | -0.6 (0.3)                                     |         | 0.8 (0.5)                             |         |
|                             | Q4: [366.6, 33 742]     | -0.7 (0.3)                                     |         | 1.4 (0.5)                             |         |
| NTproBNP*<br>UACR           | Q1 NTproBNP*<30 UACR    | Ref                                            | .2      | Ref                                   | .1      |
|                             | Q2 NTproBNP*30-299 UACR | -0.2 (0.4)                                     |         | -0.2 (0.6)                            |         |
|                             | Q3 NTproBNP*30-299 UACR | 0.1 (0.4)                                      |         | -0.1 (0.6)                            |         |
|                             | Q4 NTproBNP*30-299 UACR | 0.1 (0.4)                                      |         | -0.9 (0.6)                            |         |
|                             | Q2 NTproBNP*≥300 UACR   | 0.6 (0.4)                                      |         | -0.7 (0.5)                            |         |
|                             | Q3 NTproBNP*≥300 UACR   | 1.0 (0.5)                                      |         | -0.7 (0.5)                            |         |
|                             | Q4 NTproBNP*≥300 UACR   | 0.3 (0.5)                                      |         | -0.9 (0.6)                            |         |
| <b>Kidney Injury Marker</b> |                         |                                                |         |                                       |         |
| Urine NGAL,<br>ng/ml        | Q1: [0.4, 6.3)          | Ref                                            | <.001   | Ref                                   | .5      |
|                             | Q2: [6.3, 14.2)         | -0.3 (0.2)                                     |         | 0.3 (0.4)                             |         |
|                             | Q3: [14.2, 32.9)        | -0.3 (0.2)                                     |         | -0.2 (0.4)                            |         |
|                             | Q4: [32.9, 2743.8]      | -0.2 (0.3)                                     |         | -0.1 (0.5)                            |         |
| Urine NGAL*<br>UACR         | Q1 NGAL*<30 UACR        | Ref                                            | <.001   | Ref                                   | .003    |
|                             | Q2 NGAL*30-299 UACR     | 0.3 (0.4)                                      |         | -0.7 (0.4)                            |         |
|                             | Q3 NGAL*30-299 UACR     | 0.1 (0.4)                                      |         | 0.1 (0.5)                             |         |
|                             | Q4 NGAL*30-299 UACR     | 0.4 (0.4)                                      |         | 0.4 (0.6)                             |         |
|                             | Q2 NGAL*≥300 UACR       | -0.7 (0.4)                                     |         | 0.3 (0.4)                             |         |

|  |                    | With Diabetes                                  |         |                                       |         |
|--|--------------------|------------------------------------------------|---------|---------------------------------------|---------|
|  |                    | eGFR Slope,<br>mL/min/1.73m <sup>2</sup> /year |         | KRT/eGFR Halving                      |         |
|  |                    | Beta Coefficient <sup>a</sup><br>(SE)          | P value | Beta Coefficient <sup>b</sup><br>(SE) | P value |
|  | Q3 NGAL *≥300 UACR | -1.3 (0.4)                                     |         | 1.0 (0.4)                             |         |
|  | Q4 NGAL *≥300 UACR | -1.9 (0.4)                                     |         | 1.5 (0.5)                             |         |

Abbreviations: BP: blood pressure; CKD: chronic kidney disease; eGFR: estimated glomerular filtration rate; KRT: kidney replacement therapy; HbA1c: glycosylated hemoglobin; NGAL: neutrophil gelatinase-associated lipocalin; NH: non-Hispanic; NTproBNP: N-terminal pro-B-type natriuretic peptide; Ref: reference; SE: standard error; UACR: urine albumin:creatinine ratio

N/A indicates variable was excluded from analysis for indicated outcome as only variables selected by models described in Table 3 were tested for interaction.

<sup>a</sup> Negative coefficients represent a faster decline in eGFR compared to the reference group.

<sup>b</sup> Coefficients are the log hazard ratio to the reference level with positive coefficients indicating increased risk of KRT/eGFR Halving compared to the reference group.

\* Indicates interaction between variables. Sum of main and interaction beta coefficients will provide estimate for given group.

**Table S4a. Multivariable-adjusted models of chronic kidney disease progression with race interaction among CRIC participants without diabetes**

|                                                    |                                  | Without Diabetes                               |         |                                       |         |
|----------------------------------------------------|----------------------------------|------------------------------------------------|---------|---------------------------------------|---------|
|                                                    |                                  | eGFR Slope,<br>mL/min/1.73m <sup>2</sup> /year |         | KRT/eGFR Halving                      |         |
|                                                    |                                  | Beta Coefficient <sup>a</sup><br>(SE)          | P value | Beta Coefficient <sup>b</sup><br>(SE) | P value |
| <b>Demographic Factors</b>                         |                                  |                                                |         |                                       |         |
| Gender                                             | Male                             | Ref                                            | .2      | Ref                                   | .05     |
|                                                    | Female                           | 0.3 (0.1)                                      |         | -0.5 (0.3)                            |         |
| Race/<br>ethnicity                                 | NH-White                         | Ref                                            | <.001   | Ref                                   | .5      |
|                                                    | NH-Black, APOL1 low-risk         | 0.8 (0.5)                                      |         | 0.3 (0.8)                             |         |
|                                                    | NH-Black, APOL1 high-risk        | -0.9 (0.8)                                     |         | 2.3 (1.3)                             |         |
|                                                    | Hispanic                         | 1.2 (1.0)                                      |         | 0.4 (1.3)                             |         |
|                                                    | Other                            | -1.2 (1.6)                                     |         | -2.1 (3.7)                            |         |
| Gender*Race<br>/ethnicity                          | Male*NH-White                    | Ref                                            | .7      | Ref                                   | .8      |
|                                                    | Female*NH-Black, APOL1 low-risk  | 0.2 (0.2)                                      |         | -0.3 (0.4)                            |         |
|                                                    | Female*NH-Black, APOL1 high-risk | -0.1 (0.4)                                     |         | -0.6 (0.5)                            |         |
|                                                    | Female*Hispanic                  | -0.4 (0.5)                                     |         | -0.2 (0.9)                            |         |
|                                                    | Female*Other                     | 0.1 (0.8)                                      |         | -1.9 (2.6)                            |         |
| <b>Kidney Function Measures</b>                    |                                  |                                                |         |                                       |         |
| Baseline<br>eGFR,<br>mL/min/<br>1.73m <sup>2</sup> | <30                              | 0.2 (0.2)                                      | .005    | 0.4 (0.2)                             | <.001   |
|                                                    | 30-44.9                          | Ref                                            |         | Ref                                   |         |
|                                                    | 45-59.9                          | 0.0 (0.2)                                      |         | -0.7 (0.2)                            |         |
|                                                    | ≥60                              | 0.1 (0.2)                                      |         | -1.6 (0.4)                            |         |



|                                     |                                           | Without Diabetes                               |         |                                       |         |
|-------------------------------------|-------------------------------------------|------------------------------------------------|---------|---------------------------------------|---------|
|                                     |                                           | eGFR Slope,<br>mL/min/1.73m <sup>2</sup> /year |         | KRT/eGFR Halving                      |         |
|                                     |                                           | Beta Coefficient <sup>a</sup><br>(SE)          | P value | Beta Coefficient <sup>b</sup><br>(SE) | P value |
| Baseline<br>eGFR*Race/<br>ethnicity | 30-44.9 eGFR*NH-White                     | Ref                                            | .5      | Ref                                   | .2      |
|                                     | <30 eGFR*NH-Black,<br>APOL1 low-risk      | 0.4 (0.4)                                      |         | 0.4 (0.4)                             |         |
|                                     | 45-59.9 eGFR*NH-Black,<br>APOL1 low-risk  | 0.0 (0.3)                                      |         | 0.2 (0.4)                             |         |
|                                     | ≥60 eGFR*NH-Black,<br>APOL1 low-risk      | 0.2 (0.3)                                      |         | 0.6 (0.6)                             |         |
|                                     | <30 eGFR*NH-Black,<br>APOL1 high-risk     | 1.2 (0.7)                                      |         | -0.1 (0.5)                            |         |
|                                     | 45-59.9 eGFR*NH-Black,<br>APOL1 high-risk | 0.9 (0.5)                                      |         | -1.1 (0.5)                            |         |
|                                     | ≥60 eGFR*NH-Black,<br>APOL1 high-risk     | 0.7 (0.5)                                      |         | -0.6 (0.9)                            |         |
|                                     | <30 eGFR*Hispanic                         | 0.2 (0.7)                                      |         | 0.5 (0.5)                             |         |
|                                     | 45-59.9 eGFR*Hispanic                     | 0.3 (0.5)                                      |         | 0.5 (0.6)                             |         |
|                                     | ≥60 eGFR*Hispanic                         | 1.1 (0.7)                                      |         | -11.9 (709.0)                         |         |
|                                     | <30 eGFR*Other                            | 1.2 (1.7)                                      |         | -1.4 (2.5)                            |         |
|                                     | 45-59.9 eGFR*Other                        | -0.2 (1.0)                                     |         | -5.5 (2.1)                            |         |
|                                     | ≥60 eGFR*Other                            | 1.2 (1.1)                                      |         | -12.5 (5.0)                           |         |
| UACR,<br>mg/g                       | <30                                       | Ref                                            | <.001   | Ref                                   | <.001   |
|                                     | 30-299                                    | -0.8 (0.1)                                     |         | 1.1 (0.3)                             |         |
|                                     | ≥300                                      | -1.7 (0.2)                                     |         | 2.4 (0.3)                             |         |
| UACR*Race/<br>ethnicity             | <30 UACR*NH-White                         | Ref                                            | <.001   | Ref                                   | .05     |
|                                     | 30-299 UACR*NH-Black,<br>APOL1 low-risk   | -0.5 (0.2)                                     |         | 0.4 (0.4)                             |         |
|                                     | ≥300 UACR*NH-Black,<br>APOL1 low-risk     | -1.0 (0.3)                                     |         | 0.4 (0.4)                             |         |
|                                     | 30-299 UACR*NH-Black,<br>APOL1 high-risk  | -0.7 (0.4)                                     |         | 1.3 (0.6)                             |         |
|                                     | ≥300 UACR*NH-Black,<br>APOL1 high-risk    | -2.4 (0.6)                                     |         | 1.1 (0.7)                             |         |
|                                     | 30-299 UACR*Hispanic                      | 0.8 (0.5)                                      |         | -1.7 (0.8)                            |         |
|                                     | ≥300 UACR*Hispanic                        | -0.1 (0.5)                                     |         | -1.0 (0.7)                            |         |
|                                     | 30-299 UACR*Other                         | 0.3 (0.7)                                      |         | 1.7 (1.6)                             |         |

|                                   |                                         | Without Diabetes                               |         |                                       |         |
|-----------------------------------|-----------------------------------------|------------------------------------------------|---------|---------------------------------------|---------|
|                                   |                                         | eGFR Slope,<br>mL/min/1.73m <sup>2</sup> /year |         | KRT/eGFR Halving                      |         |
|                                   |                                         | Beta Coefficient <sup>a</sup><br>(SE)          | P value | Beta Coefficient <sup>b</sup><br>(SE) | P value |
|                                   | ≥300 UACR*Other                         | 0.1 (0.9)                                      |         | 4.4 (2.3)                             |         |
| <b>Blood Pressure Factors</b>     |                                         |                                                |         |                                       |         |
| Systolic BP,<br>mmHg              | <120                                    | Ref                                            | .3      | Ref                                   | .3      |
|                                   | 120-139                                 | -0.1 (0.1)                                     |         | 0.2 (0.2)                             |         |
|                                   | ≥140                                    | -0.5 (0.2)                                     |         | 0.5 (0.3)                             |         |
| Systolic<br>BP*Race/<br>ethnicity | <120 BP*NH-White                        | Ref                                            | .3      | Ref                                   | .03     |
|                                   | 120-139 BP*NH-Black,<br>APOL1 low-risk  | -0.3 (0.2)                                     |         | 0.0 (0.3)                             |         |
|                                   | ≥140 BP*NH-Black, APOL1<br>low-risk     | -0.1 (0.3)                                     |         | 0.1 (0.4)                             |         |
|                                   | 120-139 BP*NH-Black,<br>APOL1 high-risk | -0.2 (0.4)                                     |         | 0.5 (0.4)                             |         |
|                                   | ≥140 BP*NH-Black, APOL1<br>high-risk    | 1.4 (0.6)                                      |         | -1.4 (0.6)                            |         |
|                                   | 120-139 BP*Hispanic                     | -0.3 (0.4)                                     |         | 0.1 (0.6)                             |         |
|                                   | ≥140 BP*Hispanic                        | 0.2 (0.6)                                      |         | 0.1 (0.7)                             |         |
|                                   | 120-139 BP*Other                        | -0.1 (0.7)                                     |         | -2.0 (1.5)                            |         |
|                                   | ≥140 BP*Other                           | 0.2 (0.8)                                      |         | 5.2 (2.6)                             |         |
| ACE/ARB                           | No                                      | Ref                                            | .04     | -                                     | N/A     |
|                                   | Yes                                     | 0.2 (0.1)                                      |         | -                                     |         |
| ACE/ARB*Ra<br>ce/ ethnicity       | No*NH-White                             | Ref                                            | .2      | -                                     | N/A     |
|                                   | Yes*NH-Black, APOL1 low-<br>risk        | -0.2 (0.2)                                     |         | -                                     |         |
|                                   | Yes*NH-Black, APOL1<br>high-risk        | 0.3 (0.4)                                      |         | -                                     |         |
|                                   | Yes*Hispanic                            | -0.3 (0.4)                                     |         | -                                     |         |
|                                   | Yes*Other                               | 1.3 (0.7)                                      |         | -                                     |         |
| <b>Body Composition Measures</b>  |                                         |                                                |         |                                       |         |
| Fat-free<br>mass,<br>kg           | Q1: [25.8, 49.1)                        | -                                              | N/A     | Ref                                   | .6      |
|                                   | Q2: [49.1, 59.1)                        | -                                              |         | -0.1 (0.3)                            |         |
|                                   | Q3: [59.1, 69.9)                        | -                                              |         | -0.3 (0.3)                            |         |
|                                   | Q4: [69.9, 167.1)                       | -                                              |         | 0.0 (0.3)                             |         |
|                                   | Q1 FFM*NH-White                         | -                                              | N/A     | Ref                                   | <.001   |

|                                   |                                                           | Without Diabetes                               |         |                                       |         |
|-----------------------------------|-----------------------------------------------------------|------------------------------------------------|---------|---------------------------------------|---------|
|                                   |                                                           | eGFR Slope,<br>mL/min/1.73m <sup>2</sup> /year |         | KRT/eGFR Halving                      |         |
|                                   |                                                           | Beta Coefficient <sup>a</sup><br>(SE)          | P value | Beta Coefficient <sup>b</sup><br>(SE) | P value |
| Fat-free mass*Race/<br>ethnicity  | Q2 FFM*NH-Black, APOL1 low-risk                           | -                                              |         | -0.5 (0.4)                            |         |
|                                   | Q3 FFM*NH-Black, APOL1 low-risk                           | -                                              |         | 0.4 (0.5)                             |         |
|                                   | Q4 FFM*NH-Black, APOL1 low-risk                           | -                                              |         | 0.0 (0.5)                             |         |
|                                   | Q2 FFM*NH-Black, APOL1 high-risk                          | -                                              |         | -1.4 (0.6)                            |         |
|                                   | Q3 FFM*NH-Black, APOL1 high-risk                          | -                                              |         | -2.5 (0.7)                            |         |
|                                   | Q4 FFM*NH-Black, APOL1 high-risk                          | -                                              |         | -0.5 (0.6)                            |         |
|                                   | Q2 FFM*Hispanic                                           | -                                              |         | -1.4 (1.0)                            |         |
|                                   | Q3 FFM*Hispanic                                           | -                                              |         | -1.0 (0.9)                            |         |
|                                   | Q4 FFM*Hispanic                                           | -                                              |         | 0.0 (1.0)                             |         |
|                                   | Q2 FFM*Other                                              | -                                              |         | 1.8 (2.4)                             |         |
|                                   | Q3 FFM*Other                                              | -                                              |         | 8.7 (3.6)                             |         |
|                                   | Q4 FFM*Other                                              | -                                              |         | 2.5 (2.4)                             |         |
| <b>Measure of Anemia</b>          |                                                           |                                                |         |                                       |         |
| Hemoglobin,<br>mg/dL              | M: <12, F: <11                                            | -                                              | N/A     | 0.2 (0.3)                             | .3      |
|                                   | M: 12-13.9, F: 11-12.9                                    | -                                              |         | Ref                                   |         |
|                                   | M: ≥14, F: ≥13                                            | -                                              |         | -0.3 (0.2)                            |         |
| Hemoglobin*<br>Race/<br>ethnicity | M: 12-13.9, F: 11-12.9<br>Hemoglobin*NH-White             | -                                              | N/A     | Ref                                   | .1      |
|                                   | M: <12, F: <11<br>Hemoglobin*NH-Black,<br>APOL1 low-risk  | -                                              |         | -0.1 (0.4)                            |         |
|                                   | M: ≥14, F: ≥13<br>Hemoglobin*NH-Black,<br>APOL1 low-risk  | -                                              |         | -0.3 (0.4)                            |         |
|                                   | M: <12, F: <11<br>Hemoglobin*NH-Black,<br>APOL1 high-risk | -                                              |         | -0.3 (0.5)                            |         |
|                                   | M: ≥14, F: ≥13<br>Hemoglobin*NH-Black,<br>APOL1 high-risk | -                                              |         | -1.1 (0.5)                            |         |

|                                           |                                           | Without Diabetes                               |         |                                       |         |
|-------------------------------------------|-------------------------------------------|------------------------------------------------|---------|---------------------------------------|---------|
|                                           |                                           | eGFR Slope,<br>mL/min/1.73m <sup>2</sup> /year |         | KRT/eGFR Halving                      |         |
|                                           |                                           | Beta Coefficient <sup>a</sup><br>(SE)          | P value | Beta Coefficient <sup>b</sup><br>(SE) | P value |
|                                           | M: <12, F: <11<br>Hemoglobin*Hispanic     | -                                              |         | -0.4 (0.6)                            |         |
|                                           | M: ≥14, F: ≥13<br>Hemoglobin*Hispanic     | -                                              |         | 0.0 (0.7)                             |         |
|                                           | M: <12, F: <11<br>Hemoglobin*Other        | -                                              |         | 4.7 (1.7)                             |         |
|                                           | M: ≥14, F: ≥13<br>Hemoglobin*Other        | -                                              |         | 0.5 (0.9)                             |         |
| <b>Mineral Metabolism Markers</b>         |                                           |                                                |         |                                       |         |
| Serum<br>phosphate,<br>mg/dL              | Q1: [1.7, 3.3)                            | -0.1 (0.1)                                     | .2      | -                                     | N/A     |
|                                           | Q2: [3.3, 3.7)                            | Ref                                            |         | -                                     |         |
|                                           | Q3: [3.7, 4.1)                            | 0.2 (0.2)                                      |         | -                                     |         |
|                                           | Q4: [4.1, 9.3]                            | -0.3 (0.2)                                     |         | -                                     |         |
| Serum<br>phosphate*<br>Race/<br>ethnicity | Q2 phosphate*NH-White                     | Ref                                            | .06     | -                                     | N/A     |
|                                           | Q1 phosphate*NH-Black,<br>APOL1 low-risk  | -0.6 (0.3)                                     |         | -                                     |         |
|                                           | Q3 phosphate*NH-Black,<br>APOL1 low-risk  | -0.3 (0.3)                                     |         | -                                     |         |
|                                           | Q4 phosphate*NH-Black,<br>APOL1 low-risk  | 0.2 (0.3)                                      |         | -                                     |         |
|                                           | Q1 phosphate*NH-Black,<br>APOL1 high-risk | -1.4 (0.5)                                     |         | -                                     |         |
|                                           | Q3 phosphate*NH-Black,<br>APOL1 high-risk | -1.3 (0.5)                                     |         | -                                     |         |
|                                           | Q4 phosphate*NH-Black,<br>APOL1 high-risk | -0.5 (0.6)                                     |         | -                                     |         |
|                                           | Q1 phosphate*Hispanic                     | -0.7 (0.5)                                     |         | -                                     |         |
|                                           | Q3 phosphate*Hispanic                     | -0.4 (0.5)                                     |         | -                                     |         |
|                                           | Q4 phosphate*Hispanic                     | 0.4 (0.6)                                      |         | -                                     |         |
|                                           | Q1 phosphate*Other                        | 0.8 (0.7)                                      |         | -                                     |         |
|                                           | Q3 phosphate*Other                        | -0.2 (0.7)                                     |         | -                                     |         |
| Q4 phosphate*Other                        | 0.2 (0.8)                                 | -                                              |         |                                       |         |
| <b>Cardiac Markers</b>                    |                                           |                                                |         |                                       |         |
|                                           | Q1: [1.5, 5.5)                            | -                                              | N/A     | Ref                                   | .2      |

|                                 |                                         | Without Diabetes                               |         |                                       |         |
|---------------------------------|-----------------------------------------|------------------------------------------------|---------|---------------------------------------|---------|
|                                 |                                         | eGFR Slope,<br>mL/min/1.73m <sup>2</sup> /year |         | KRT/eGFR Halving                      |         |
|                                 |                                         | Beta Coefficient <sup>a</sup><br>(SE)          | P value | Beta Coefficient <sup>b</sup><br>(SE) | P value |
| hsTnT,<br>pg/mL                 | Q2: [5.5, 11.4)                         | -                                              |         | 0.3 (0.2)                             |         |
|                                 | Q3: (11.4, 22.2)                        | -                                              |         | -0.2 (0.3)                            |         |
|                                 | Q4: (22.2, 738.7)                       | -                                              |         | -0.3 (0.3)                            |         |
| hsTnT*Race/<br>ethnicity        | Q1 hsTnT*NH-White                       | -                                              | N/A     | Ref                                   | .3      |
|                                 | Q2 hsTnT*NH-Black,<br>APOL1 low-risk    | -                                              |         | 0.0 (0.4)                             |         |
|                                 | Q3 hsTnT*NH-Black,<br>APOL1 low-risk    | -                                              |         | 0.3 (0.4)                             |         |
|                                 | Q4 hsTnT*NH-Black,<br>APOL1 low-risk    | -                                              |         | 0.3 (0.5)                             |         |
|                                 | Q2 hsTnT*NH-Black,<br>APOL1 high-risk   | -                                              |         | 0.2 (0.5)                             |         |
|                                 | Q3 hsTnT*NH-Black,<br>APOL1 high-risk   | -                                              |         | -1.2 (0.7)                            |         |
|                                 | Q4 hsTnT*NH-Black,<br>APOL1 high-risk   | -                                              |         | 0.4 (0.7)                             |         |
|                                 | Q2 hsTnT*Hispanic                       | -                                              |         | -0.1 (0.6)                            |         |
|                                 | Q3 hsTnT*Hispanic                       | -                                              |         | -0.2 (0.6)                            |         |
|                                 | Q4 hsTnT*Hispanic                       | -                                              |         | -0.3 (0.8)                            |         |
|                                 | Q2 hsTnT*Other                          | -                                              |         | 3.9 (1.8)                             |         |
|                                 | Q3 hsTnT*Other                          | -                                              |         | -10.0 (4.5)                           |         |
| Q4 hsTnT*Other                  | -                                       | -4.3 (2.9)                                     |         |                                       |         |
| NTproBNP,<br>pg/mL              | Q1: [2.5, 60.2)                         | Ref                                            | .08     | Ref                                   | .03     |
|                                 | Q2: [60.2, 139.4)                       | -0.3 (0.1)                                     |         | 0.7 (0.3)                             |         |
|                                 | Q3: [139.4, 366.6)                      | -0.2 (0.2)                                     |         | 0.7 (0.3)                             |         |
|                                 | Q4: [366.6, 33 742]                     | -0.3 (0.2)                                     |         | 0.8 (0.3)                             |         |
| NTproBNP*<br>Race/<br>ethnicity | Q1 NTproBNP*NH-White                    | Ref                                            | .2      | Ref                                   | .004    |
|                                 | Q2 NTproBNP*NH-Black,<br>APOL1 low-risk | 0.7 (0.3)                                      |         | -0.5 (0.4)                            |         |
|                                 | Q3 NTproBNP*NH-Black,<br>APOL1 low-risk | -0.2 (0.3)                                     |         | -0.5 (0.4)                            |         |
|                                 | Q4 NTproBNP*NH-Black,<br>APOL1 low-risk | 0.0 (0.3)                                      |         | -0.2 (0.5)                            |         |

|                                   |                                                | Without Diabetes                               |         |                                       |         |
|-----------------------------------|------------------------------------------------|------------------------------------------------|---------|---------------------------------------|---------|
|                                   |                                                | eGFR Slope,<br>mL/min/1.73m <sup>2</sup> /year |         | KRT/eGFR Halving                      |         |
|                                   |                                                | Beta Coefficient <sup>a</sup><br>(SE)          | P value | Beta Coefficient <sup>b</sup><br>(SE) | P value |
|                                   | Q2 NTproBNP*NH-Black,<br>APOL1 high-risk       | 0.1 (0.5)                                      |         | -2.0 (0.6)                            |         |
|                                   | Q3 NTproBNP*NH-Black,<br>APOL1 high-risk       | -0.2 (0.5)                                     |         | -0.8 (0.6)                            |         |
|                                   | Q4 NTproBNP*NH-Black,<br>APOL1 high-risk       | -0.2 (0.6)                                     |         | -2.2 (0.7)                            |         |
|                                   | Q2 NTproBNP*Hispanic                           | -0.3 (0.6)                                     |         | 0.8 (0.8)                             |         |
|                                   | Q3 NTproBNP*Hispanic                           | -0.8 (0.6)                                     |         | 0.8 (0.9)                             |         |
|                                   | Q4 NTproBNP*Hispanic                           | 0.1 (0.7)                                      |         | 0.6 (1.0)                             |         |
|                                   | Q2 NTproBNP*Other                              | 0.1 (0.7)                                      |         | -3.8 (1.5)                            |         |
|                                   | Q3 NTproBNP*Other                              | -0.7 (0.9)                                     |         | 5.1 (2.4)                             |         |
|                                   | Q4 NTproBNP*Other                              | 0.6 (1.3)                                      |         | -6.8 (263.7)                          |         |
| <b>Acidosis Marker</b>            |                                                |                                                |         |                                       |         |
| Serum bicarbonate, mmol/L         | ≤22                                            | -                                              | N/A     | 0.5 (0.3)                             | .1      |
|                                   | (22, 24]                                       | -                                              |         | Ref                                   |         |
|                                   | (24, 26]                                       | -                                              |         | 0.0 (0.3)                             |         |
|                                   | >26                                            | -                                              |         | 0.1 (0.3)                             |         |
| Serum bicarbonate* Race/ethnicity | (22, 24] bicarbonate*NH-White                  | -                                              | N/A     | Ref                                   | .08     |
|                                   | ≤22 bicarbonate*NH-Black, APOL1 low-risk       | -                                              |         | -0.1 (0.4)                            |         |
|                                   | (24, 26] bicarbonate*NH-Black, APOL1 low-risk  | -                                              |         | 0.0 (0.4)                             |         |
|                                   | >26 bicarbonate*NH-Black, APOL1 low-risk       | -                                              |         | -0.2 (0.4)                            |         |
|                                   | ≤22 bicarbonate*NH-Black, APOL1 high-risk      | -                                              |         | -1.5 (0.5)                            |         |
|                                   | (24, 26] bicarbonate*NH-Black, APOL1 high-risk | -                                              |         | -0.3 (0.5)                            |         |
|                                   | >26 bicarbonate*NH-Black, APOL1 high-risk      | -                                              |         | 0.1 (0.6)                             |         |
|                                   | ≤22 bicarbonate*Hispanic                       | -                                              |         | -0.4 (0.6)                            |         |
|                                   | (24, 26] bicarbonate*Hispanic                  | -                                              |         | -1.0 (0.8)                            |         |
|                                   | >26 bicarbonate*Hispanic                       | -                                              |         | -0.5 (0.9)                            |         |

|                                 |                                        | Without Diabetes                               |         |                                       |         |
|---------------------------------|----------------------------------------|------------------------------------------------|---------|---------------------------------------|---------|
|                                 |                                        | eGFR Slope,<br>mL/min/1.73m <sup>2</sup> /year |         | KRT/eGFR Halving                      |         |
|                                 |                                        | Beta Coefficient <sup>a</sup><br>(SE)          | P value | Beta Coefficient <sup>b</sup><br>(SE) | P value |
|                                 | ≤22 bicarbonate*Other                  | -                                              |         | 5.9 (2.6)                             |         |
|                                 | (24, 26] bicarbonate*Other             | -                                              |         | 4.8 (2.4)                             |         |
|                                 | >26 bicarbonate*Other                  | -                                              |         | 0.0 (1.4)                             |         |
| <b>Urinary Electrolytes</b>     |                                        |                                                |         |                                       |         |
| Urine potassium, mmol/24h       | Q1: [3.0, 37.5)                        | Ref                                            | .5      | -                                     | N/A     |
|                                 | Q2: [37.5, 51.8)                       | 0.2 (0.2)                                      |         | -                                     |         |
|                                 | Q3: [51.8, 69.4)                       | -0.1 (0.2)                                     |         | -                                     |         |
|                                 | Q4: [69.4, 417.7]                      | 0.1 (0.2)                                      |         | -                                     |         |
| Urine potassium* Race/ethnicity | Q1 potassium*NH-White                  | Ref                                            | .05     | -                                     | N/A     |
|                                 | Q2 potassium*NH-Black, APOL1 low-risk  | -0.7 (0.3)                                     |         | -                                     |         |
|                                 | Q3 potassium*NH-Black, APOL1 low-risk  | 0.1 (0.3)                                      |         | -                                     |         |
|                                 | Q4 potassium*NH-Black, APOL1 low-risk  | -0.2 (0.4)                                     |         | -                                     |         |
|                                 | Q2 potassium*NH-Black, APOL1 high-risk | 0.3 (0.5)                                      |         | -                                     |         |
|                                 | Q3 potassium*NH-Black, APOL1 high-risk | 0.2 (0.5)                                      |         | -                                     |         |
|                                 | Q4 potassium*NH-Black, APOL1 high-risk | -0.3 (0.5)                                     |         | -                                     |         |
|                                 | Q2 potassium*Hispanic                  | 0.1 (0.6)                                      |         | -                                     |         |
|                                 | Q3 potassium*Hispanic                  | 0.7 (0.6)                                      |         | -                                     |         |
|                                 | Q4 potassium*Hispanic                  | 1.0 (0.5)                                      |         | -                                     |         |
|                                 | Q2 potassium*Other                     | -0.6 (1.3)                                     |         | -                                     |         |
|                                 | Q3 potassium*Other                     | -1.8 (1.3)                                     |         | -                                     |         |
| Q4 potassium*Other              | -1.0 (1.3)                             | -                                              |         |                                       |         |
| <b>Kidney Injury Marker</b>     |                                        |                                                |         |                                       |         |
| Urine NGAL, ng/ml               | Q1: [0.4, 6.3)                         | Ref                                            | .1      | Ref                                   | .06     |
|                                 | Q2: [6.3, 14.2)                        | -0.2 (0.1)                                     |         | 0.4 (0.3)                             |         |
|                                 | Q3: [14.2, 32.9)                       | 0.0 (0.2)                                      |         | -0.1 (0.3)                            |         |
|                                 | Q4: [32.9, 2743.8]                     | -0.1 (0.2)                                     |         | 0.5 (0.3)                             |         |
|                                 | Q1 NGAL*NH-White                       | Ref                                            | .5      | Ref                                   | .2      |

|                                             |                                             | Without Diabetes                               |         |                                       |         |
|---------------------------------------------|---------------------------------------------|------------------------------------------------|---------|---------------------------------------|---------|
|                                             |                                             | eGFR Slope,<br>mL/min/1.73m <sup>2</sup> /year |         | KRT/eGFR Halving                      |         |
|                                             |                                             | Beta Coefficient <sup>a</sup><br>(SE)          | P value | Beta Coefficient <sup>b</sup><br>(SE) | P value |
| Urine<br>NGAL*Race/<br>ethnicity            | Q2 NGAL*NH-Black,<br>APOL1 low-risk         | -0.3 (0.3)                                     |         | 0.2 (0.4)                             |         |
|                                             | Q3 NGAL*NH-Black,<br>APOL1 low-risk         | -0.5 (0.3)                                     |         | 0.5 (0.5)                             |         |
|                                             | Q4 NGAL*NH-Black,<br>APOL1 low-risk         | -0.5 (0.3)                                     |         | 0.0 (0.5)                             |         |
|                                             | Q2 NGAL*NH-Black,<br>APOL1 high-risk        | 0.6 (0.6)                                      |         | 1.6 (0.9)                             |         |
|                                             | Q3 NGAL*NH-Black,<br>APOL1 high-risk        | -0.4 (0.6)                                     |         | 1.7 (1.0)                             |         |
|                                             | Q4 NGAL*NH-Black,<br>APOL1 high-risk        | -0.5 (0.6)                                     |         | 1.8 (1.0)                             |         |
|                                             | Q2 NGAL*Hispanic                            | -0.6 (0.6)                                     |         | 0.9 (1.1)                             |         |
|                                             | Q3 NGAL*Hispanic                            | -1.1 (0.6)                                     |         | 1.3 (1.0)                             |         |
|                                             | Q4 NGAL*Hispanic                            | -0.7 (0.7)                                     |         | 1.1 (1.0)                             |         |
|                                             | Q2 NGAL*Other                               | 0.0 (0.8)                                      |         | -6.3 (2.1)                            |         |
|                                             | Q3 NGAL*Other                               | -0.1 (0.8)                                     |         | -0.4 (1.8)                            |         |
|                                             | Q4 NGAL*Other                               | -0.7 (1.0)                                     |         | -2.5 (1.8)                            |         |
| <b>RAAS Marker</b>                          |                                             |                                                |         |                                       |         |
| Serum<br>aldosterone,<br>pg/mL              | Q1: [0.8, 71.2)                             | Ref                                            | .6      | -                                     | N/A     |
|                                             | Q2: [71.2, 101.4)                           | -0.1 (0.2)                                     |         | -                                     |         |
|                                             | Q3: [101.4, 152.8)                          | -0.3 (0.2)                                     |         | -                                     |         |
|                                             | Q4: [152.8, 15 630.9]                       | 0.0 (0.2)                                      |         | -                                     |         |
| Serum<br>aldosterone*<br>Race/<br>ethnicity | Q1 aldosterone*NH-White                     | Ref                                            | .3      | -                                     | N/A     |
|                                             | Q2 aldosterone*NH-Black,<br>APOL1 low-risk  | -0.3 (0.3)                                     |         | -                                     |         |
|                                             | Q3 aldosterone*NH-Black,<br>APOL1 low-risk  | 0.2 (0.3)                                      |         | -                                     |         |
|                                             | Q4 aldosterone*NH-Black,<br>APOL1 low-risk  | 0.3 (0.3)                                      |         | -                                     |         |
|                                             | Q2 aldosterone*NH-Black,<br>APOL1 high-risk | 0.5 (0.6)                                      |         | -                                     |         |
|                                             | Q3 aldosterone*NH-Black,<br>APOL1 high-risk | 0.9 (0.6)                                      |         | -                                     |         |



|                                             | Without Diabetes                               |         |                                       |         |
|---------------------------------------------|------------------------------------------------|---------|---------------------------------------|---------|
|                                             | eGFR Slope,<br>mL/min/1.73m <sup>2</sup> /year |         | KRT/eGFR Halving                      |         |
|                                             | Beta Coefficient <sup>a</sup><br>(SE)          | P value | Beta Coefficient <sup>b</sup><br>(SE) | P value |
| Q4 aldosterone*NH-Black,<br>APOL1 high-risk | 0.5 (0.5)                                      |         | -                                     |         |
| Q2 aldosterone*Hispanic                     | -1.3 (0.5)                                     |         | -                                     |         |
| Q3 aldosterone*Hispanic                     | -0.6 (0.5)                                     |         | -                                     |         |
| Q4 aldosterone*Hispanic                     | -0.4 (0.7)                                     |         | -                                     |         |
| Q2 aldosterone*Other                        | 0.7 (0.8)                                      |         | -                                     |         |
| Q3 aldosterone*Other                        | 0.6 (0.9)                                      |         | -                                     |         |
| Q4 aldosterone*Other                        | 0.1 (0.8)                                      |         | -                                     |         |

Abbreviations: ACE: angiotensin converting enzyme; ARB: angiotensin receptor blocker; BP: blood pressure; CKD: chronic kidney disease; eGFR: estimated glomerular filtration rate; KRT: kidney replacement therapy; FFM: fat-free mass; hsTnT: high-sensitivity troponin T; NGAL: neutrophil gelatinase-associated lipocalin; NH: non-Hispanic; NTproBNP: N-terminal pro-B-type natriuretic peptide; RAAS: renin-angiotensin-aldosterone system; Ref: reference; SE: standard error; UACR: urine albumin:creatinine ratio

N/A indicates variable was excluded from analysis for indicated outcome as only variables selected by models described in Table 2 were tested for interaction.

SI conversion: To convert Hemoglobin to g/L, multiply by 0.01. To convert serum phosphate to mmol/L, multiply by 0.323. For serum bicarbonate, 1 mEq/L is equivalent to 1 mmol/L. For urine potassium, 1 mEq/24h is equivalent to 1 mmol/d. To convert serum aldosterone to pmol/L, multiply by 2.774.

<sup>a</sup> Negative coefficients represent a faster decline in eGFR compared to the reference group.

<sup>b</sup> Coefficients are the log hazard ratio to the reference level with positive coefficients indicating increased risk of KRT/eGFR Halving compared to the reference group.

\* Indicates interaction between variables. Sum of main and interaction beta coefficients will provide estimate for given group.

**Table S4b. Multivariable-adjusted models of chronic kidney disease progression with race interaction among CRIC participants with diabetes**

|                            |                                     | With Diabetes                                  |         |                                       |         |
|----------------------------|-------------------------------------|------------------------------------------------|---------|---------------------------------------|---------|
|                            |                                     | eGFR Slope,<br>mL/min/1.73m <sup>2</sup> /year |         | KRT/eGFR Halving                      |         |
|                            |                                     | Beta Coefficient <sup>a</sup><br>(SE)          | P value | Beta Coefficient <sup>b</sup><br>(SE) | P value |
| <b>Demographic Factors</b> |                                     |                                                |         |                                       |         |
| Age,<br>years              | <45                                 | -0.5 (0.3)                                     | .5      | 0.0 (0.3)                             | .03     |
|                            | 45-64                               | Ref                                            |         | Ref                                   |         |
|                            | 65-75                               | 0.0 (0.2)                                      |         | -0.5 (0.2)                            |         |
| Race/<br>ethnicity         | NH-White                            | Ref                                            | .02     | Ref                                   | .9      |
|                            | NH-Black, APOL1 low-risk            | 0.1 (0.6)                                      |         | -0.3 (0.9)                            |         |
|                            | NH-Black, APOL1 high-risk           | -0.5 (1.4)                                     |         | 0.2 (1.7)                             |         |
|                            | Hispanic                            | -0.8 (0.8)                                     |         | -1.0 (1.5)                            |         |
|                            | Other                               | 0.5 (1.4)                                      |         | -0.1 (2.6)                            |         |
| Age*Race/<br>ethnicity     | 45-64 age*NH-White                  | Ref                                            | .7      | Ref                                   | .2      |
|                            | <45 age*NH-Black, APOL1 low-risk    | -0.7 (0.6)                                     |         | 0.5 (0.4)                             |         |
|                            | 65-75 age*NH-Black, APOL1 low-risk  | 0.0 (0.3)                                      |         | 0.3 (0.3)                             |         |
|                            | <45 age*NH-Black, APOL1 high-risk   | 0.6 (1.1)                                      |         | -0.9 (0.7)                            |         |
|                            | 65-75 age*NH-Black, APOL1 high-risk | -0.6 (0.7)                                     |         | 0.7 (0.5)                             |         |
|                            | <45 age*Hispanic                    | 0.2 (0.7)                                      |         | 0.7 (0.4)                             |         |
|                            | 65-75 age*Hispanic                  | 0.5 (0.4)                                      |         | 0.1 (0.3)                             |         |
|                            | <45 age*Other                       | 0.1 (1.6)                                      |         | 1.3 (1.3)                             |         |
|                            | 65-75 age*Other                     | -0.6 (0.8)                                     |         | 1.1 (0.9)                             |         |
| Gender                     | Male                                | -                                              | N/A     | Ref                                   | .2      |
|                            | Female                              | -                                              |         | -0.3 (0.2)                            |         |
| Gender*Race/<br>ethnicity  | Male*NH-White                       | -                                              | N/A     | Ref                                   | .02     |
|                            | Female*NH-Black, APOL1 low-risk     | -                                              |         | -0.1 (0.3)                            |         |
|                            | Female*NH-Black, APOL1 high-risk    | -                                              |         | -0.2 (0.5)                            |         |
|                            | Female*Hispanic                     | -                                              |         | -0.2 (0.3)                            |         |
|                            | Female*Other                        | -                                              |         | -3.6 (1.1)                            |         |

|                                          |                                        | With Diabetes                                  |         |                                       |         |
|------------------------------------------|----------------------------------------|------------------------------------------------|---------|---------------------------------------|---------|
|                                          |                                        | eGFR Slope,<br>mL/min/1.73m <sup>2</sup> /year |         | KRT/eGFR Halving                      |         |
|                                          |                                        | Beta Coefficient <sup>a</sup><br>(SE)          | P value | Beta Coefficient <sup>b</sup><br>(SE) | P value |
| <b>Kidney Function Measures</b>          |                                        |                                                |         |                                       |         |
| Baseline eGFR, mL/min/1.73m <sup>2</sup> | <30                                    | 0.2 (0.3)                                      | <.001   | 0.7 (0.2)                             | <.001   |
|                                          | 30-44.9                                | Ref                                            |         | Ref                                   |         |
|                                          | 45-59.9                                | -0.4 (0.2)                                     |         | -0.3 (0.2)                            |         |
|                                          | ≥60                                    | -0.6 (0.3)                                     |         | -0.9 (0.4)                            |         |
| Baseline eGFR*Race/ethnicity             | 30-44.9 eGFR*NH-White                  | Ref                                            | .7      | Ref                                   | .2      |
|                                          | <30 eGFR*NH-Black, APOL1 low-risk      | 0.6 (0.4)                                      |         | -0.4 (0.3)                            |         |
|                                          | 45-59.9 eGFR*NH-Black, APOL1 low-risk  | 0.0 (0.3)                                      |         | 0.1 (0.3)                             |         |
|                                          | ≥60 eGFR*NH-Black, APOL1 low-risk      | -0.1 (0.5)                                     |         | 1.0 (0.5)                             |         |
|                                          | <30 eGFR*NH-Black, APOL1 high-risk     | 1.5 (0.9)                                      |         | -1.1 (0.5)                            |         |
|                                          | 45-59.9 eGFR*NH-Black, APOL1 high-risk | 0.2 (0.7)                                      |         | 0.0 (0.5)                             |         |
|                                          | ≥60 eGFR*NH-Black, APOL1 high-risk     | -0.7 (1.1)                                     |         | 1.3 (0.9)                             |         |
|                                          | <30 eGFR*Hispanic                      | 0.7 (0.5)                                      |         | -0.2 (0.3)                            |         |
|                                          | 45-59.9 eGFR*Hispanic                  | 0.3 (0.4)                                      |         | -0.2 (0.4)                            |         |
|                                          | ≥60 eGFR*Hispanic                      | -0.3 (0.8)                                     |         | 0.5 (0.7)                             |         |
|                                          | <30 eGFR*Other                         | 0.5 (1.1)                                      |         | 1.2 (1.2)                             |         |
|                                          | 45-59.9 eGFR*Other                     | 0.1 (0.8)                                      |         | 0.0 (1.0)                             |         |
| ≥60 eGFR*Other                           | -1.9 (1.3)                             | 1.0 (1.4)                                      |         |                                       |         |
| UACR, mg/g                               | <30                                    | Ref                                            | <.001   | Ref                                   | <.001   |
|                                          | 30-299                                 | -0.7 (0.2)                                     |         | 0.7 (0.2)                             |         |
|                                          | ≥300                                   | -2.0 (0.3)                                     |         | 1.6 (0.2)                             |         |
| UACR*Race/ethnicity                      | <30 UACR*NH-White                      | Ref                                            | .04     | Ref                                   | .3      |
|                                          | 30-299 UACR*NH-Black, APOL1 low-risk   | -0.7 (0.3)                                     |         | 0.6 (0.4)                             |         |
|                                          | ≥300 UACR*NH-Black, APOL1 low-risk     | -1.0 (0.4)                                     |         | 0.7 (0.4)                             |         |
|                                          | 30-299 UACR*NH-Black, APOL1 high-risk  | -0.9 (0.7)                                     |         | 0.6 (0.7)                             |         |

|                                      |                                         | With Diabetes                                  |         |                                       |         |
|--------------------------------------|-----------------------------------------|------------------------------------------------|---------|---------------------------------------|---------|
|                                      |                                         | eGFR Slope,<br>mL/min/1.73m <sup>2</sup> /year |         | KRT/eGFR Halving                      |         |
|                                      |                                         | Beta Coefficient <sup>a</sup><br>(SE)          | P value | Beta Coefficient <sup>b</sup><br>(SE) | P value |
|                                      | ≥300 UACR*NH-Black,<br>APOL1 high-risk  | -1.2 (0.8)                                     |         | 0.2 (0.7)                             |         |
|                                      | 30-299 UACR*Hispanic                    | -1.4 (0.5)                                     |         | 0.9 (0.5)                             |         |
|                                      | ≥300 UACR*Hispanic                      | -0.7 (0.5)                                     |         | 0.4 (0.5)                             |         |
|                                      | 30-299 UACR*Other                       | 0.1 (0.9)                                      |         | -2.5 (1.9)                            |         |
|                                      | ≥300 UACR*Other                         | 0.5 (0.9)                                      |         | -2.1 (1.6)                            |         |
| <b>Blood Pressure Factors</b>        |                                         |                                                |         |                                       |         |
| Systolic BP,<br>mmHg                 | <120                                    | Ref                                            | .006    | Ref                                   | .002    |
|                                      | 120-139                                 | -0.1 (0.2)                                     |         | 0.2 (0.2)                             |         |
|                                      | ≥140                                    | -0.6 (0.3)                                     |         | 0.8 (0.2)                             |         |
| Systolic<br>BP*Race/<br>ethnicity    | <120 BP*NH-White                        | Ref                                            | .6      | Ref                                   | .6      |
|                                      | 120-139 BP*NH-Black,<br>APOL1 low-risk  | -0.3 (0.3)                                     |         | 0.0 (0.3)                             |         |
|                                      | ≥140 BP*NH-Black, APOL1<br>low-risk     | 0.0 (0.4)                                      |         | -0.5 (0.3)                            |         |
|                                      | 120-139 BP*NH-Black,<br>APOL1 high-risk | 0.7 (0.8)                                      |         | -0.5 (0.6)                            |         |
|                                      | ≥140 BP*NH-Black, APOL1<br>high-risk    | -0.6 (0.8)                                     |         | -0.4 (0.6)                            |         |
|                                      | 120-139 BP*Hispanic                     | 0.2 (0.5)                                      |         | -0.1 (0.4)                            |         |
|                                      | ≥140 BP*Hispanic                        | 0.2 (0.5)                                      |         | -0.2 (0.4)                            |         |
|                                      | 120-139 BP*Other                        | -0.6 (0.9)                                     |         | 1.2 (1.4)                             |         |
| ≥140 BP*Other                        | -0.9 (1.2)                              | 0.7 (1.6)                                      |         |                                       |         |
| <b>Behavioral Factor</b>             |                                         |                                                |         |                                       |         |
| Current<br>smoker                    | No                                      | Ref                                            | .2      | -                                     | N/A     |
|                                      | Yes                                     | -0.6 (0.3)                                     |         | -                                     |         |
| Current<br>smoker*Race<br>/ethnicity | No*NH-White                             | Ref                                            | .2      | -                                     | N/A     |
|                                      | Yes*NH-Black, APOL1 low-<br>risk        | 0.4 (0.4)                                      |         | -                                     |         |
|                                      | Yes*NH-Black, APOL1<br>high-risk        | -1.0 (0.8)                                     |         | -                                     |         |
|                                      | Yes*Hispanic                            | 1.4 (0.8)                                      |         | -                                     |         |
|                                      | Yes*Other                               | 0.0 (1.6)                                      |         | -                                     |         |

|                                                         |                                       | With Diabetes                                  |         |                                       |         |
|---------------------------------------------------------|---------------------------------------|------------------------------------------------|---------|---------------------------------------|---------|
|                                                         |                                       | eGFR Slope,<br>mL/min/1.73m <sup>2</sup> /year |         | KRT/eGFR Halving                      |         |
|                                                         |                                       | Beta Coefficient <sup>a</sup><br>(SE)          | P value | Beta Coefficient <sup>b</sup><br>(SE) | P value |
| <b>Inflammatory Marker and Chemokines</b>               |                                       |                                                |         |                                       |         |
| Serum<br>fractalkine<br>(CX3CL1),<br>pg/mL              | Q1: [0.1, 0.6)                        | Ref                                            | .007    | Ref                                   | .9      |
|                                                         | Q2: [0.6, 0.8)                        | -0.1 (0.3)                                     |         | 0.0 (0.3)                             |         |
|                                                         | Q3: [0.8, 1.1)                        | -0.1 (0.3)                                     |         | 0.1 (0.3)                             |         |
|                                                         | Q4: [1.1, 3.6]                        | -0.2 (0.3)                                     |         | 0.1 (0.3)                             |         |
| Serum<br>fractalkine<br>(CX3CL1)*<br>Race/<br>ethnicity | Q1 CXCL1*NH-White                     | Ref                                            | .05     | Ref                                   | .2      |
|                                                         | Q2 CXCL1*NH-Black,<br>APOL1 low-risk  | -0.2 (0.4)                                     |         | 0.4 (0.4)                             |         |
|                                                         | Q3 CXCL1*NH-Black,<br>APOL1 low-risk  | -0.7 (0.4)                                     |         | 0.6 (0.4)                             |         |
|                                                         | Q4 CXCL1*NH-Black,<br>APOL1 low-risk  | -0.6 (0.4)                                     |         | 0.7 (0.4)                             |         |
|                                                         | Q2 CXCL1*NH-Black,<br>APOL1 high-risk | 1.3 (0.9)                                      |         | -1.0 (0.7)                            |         |
|                                                         | Q3 CXCL1*NH-Black,<br>APOL1 high-risk | -0.5 (0.9)                                     |         | 0.3 (0.7)                             |         |
|                                                         | Q4 CXCL1*NH-Black,<br>APOL1 high-risk | 1.9 (0.9)                                      |         | -0.3 (0.7)                            |         |
|                                                         | Q2 CXCL1*Hispanic                     | 0.7 (0.6)                                      |         | -0.2 (0.5)                            |         |
|                                                         | Q3 CXCL1*Hispanic                     | -0.1 (0.6)                                     |         | 0.2 (0.5)                             |         |
|                                                         | Q4 CXCL1*Hispanic                     | -0.1 (0.6)                                     |         | 0.1 (0.5)                             |         |
|                                                         | Q2 CXCL1*Other                        | 1.2 (1.0)                                      |         | 0.9 (1.2)                             |         |
|                                                         | Q3 CXCL1*Other                        | 0.0 (1.1)                                      |         | -1.8 (1.2)                            |         |
| Q4 CXCL1*Other                                          | -0.4 (1.2)                            | 1.5 (1.5)                                      |         |                                       |         |
| Plasma<br>CXCL12,<br>pg/mL                              | Q1: [832.1, 2066.4)                   | -                                              | N/A     | Ref                                   | .7      |
|                                                         | Q2: [2066.4, 2410.5)                  | -                                              |         | 0.3 (0.3)                             |         |
|                                                         | Q3: [2410.5, 2797.8)                  | -                                              |         | 0.1 (0.3)                             |         |
|                                                         | Q4: [2797.8, 6173.3]                  | -                                              |         | 0.2 (0.3)                             |         |
| Plasma<br>CXCL12*<br>Race/<br>ethnicity                 | Q1 CXCL12*NH-White                    | -                                              | N/A     | Ref                                   | .1      |
|                                                         | Q2 CXCL12*NH-Black,<br>APOL1 low-risk | -                                              |         | -0.2 (0.4)                            |         |
|                                                         | Q3 CXCL12*NH-Black,<br>APOL1 low-risk | -                                              |         | 0.6 (0.3)                             |         |

|                                        |                                        | With Diabetes                                  |         |                                       |         |
|----------------------------------------|----------------------------------------|------------------------------------------------|---------|---------------------------------------|---------|
|                                        |                                        | eGFR Slope,<br>mL/min/1.73m <sup>2</sup> /year |         | KRT/eGFR Halving                      |         |
|                                        |                                        | Beta Coefficient <sup>a</sup><br>(SE)          | P value | Beta Coefficient <sup>b</sup><br>(SE) | P value |
|                                        | Q4 CXCL12*NH-Black,<br>APOL1 low-risk  | -                                              |         | 0.5 (0.3)                             |         |
|                                        | Q2 CXCL12*NH-Black,<br>APOL1 high-risk | -                                              |         | -0.2 (0.7)                            |         |
|                                        | Q3 CXCL12*NH-Black,<br>APOL1 high-risk | -                                              |         | 0.4 (0.7)                             |         |
|                                        | Q4 CXCL12*NH-Black,<br>APOL1 high-risk | -                                              |         | -0.1 (0.7)                            |         |
|                                        | Q2 CXCL12*Hispanic                     | -                                              |         | -0.6 (0.5)                            |         |
|                                        | Q3 CXCL12*Hispanic                     | -                                              |         | 0.4 (0.5)                             |         |
|                                        | Q4 CXCL12*Hispanic                     | -                                              |         | 0.0 (0.4)                             |         |
|                                        | Q2 CXCL12*Other                        | -                                              |         | 0.5 (1.0)                             |         |
|                                        | Q3 CXCL12*Other                        | -                                              |         | -1.1 (1.2)                            |         |
|                                        | Q4 CXCL12*Other                        | -                                              |         | -2.9 (1.4)                            |         |
| <b>Carbohydrate Metabolism Markers</b> |                                        |                                                |         |                                       |         |
| HbA1c,<br>%                            | Q1: [3.5, 5.6)                         | -                                              | N/A     | Ref                                   | .4      |
|                                        | Q2: [5.6, 6.2)                         | -                                              |         | 0.6 (0.5)                             |         |
|                                        | Q3: [6.2, 7.3)                         | -                                              |         | 0.2 (0.5)                             |         |
|                                        | Q4: [7.3, 15.2]                        | -                                              |         | 0.3 (0.5)                             |         |
| HbA1c*Race/<br>ethnicity               | Q1 HbA1c*NH-White                      | -                                              | N/A     | Ref                                   | .6      |
|                                        | Q2 HbA1c*NH-Black,<br>APOL1 low-risk   | -                                              |         | -0.7 (0.6)                            |         |
|                                        | Q3 HbA1c*NH-Black,<br>APOL1 low-risk   | -                                              |         | -0.3 (0.6)                            |         |
|                                        | Q4 HbA1c*NH-Black,<br>APOL1 low-risk   | -                                              |         | -0.5 (0.6)                            |         |
|                                        | Q2 HbA1c*NH-Black,<br>APOL1 high-risk  | -                                              |         | 1.3 (1.0)                             |         |
|                                        | Q3 HbA1c*NH-Black,<br>APOL1 high-risk  | -                                              |         | 0.0 (0.9)                             |         |
|                                        | Q4 HbA1c*NH-Black,<br>APOL1 high-risk  | -                                              |         | 0.5 (0.9)                             |         |
|                                        | Q2 HbA1c*Hispanic                      | -                                              |         | 0.3 (0.8)                             |         |
| Q3 HbA1c*Hispanic                      | -                                      | 0.1 (0.8)                                      |         |                                       |         |

|                                 |                                          | With Diabetes                                  |         |                                       |         |
|---------------------------------|------------------------------------------|------------------------------------------------|---------|---------------------------------------|---------|
|                                 |                                          | eGFR Slope,<br>mL/min/1.73m <sup>2</sup> /year |         | KRT/eGFR Halving                      |         |
|                                 |                                          | Beta Coefficient <sup>a</sup><br>(SE)          | P value | Beta Coefficient <sup>b</sup><br>(SE) | P value |
|                                 | Q4 HbA1c*Hispanic                        | -                                              |         | 0.1 (0.8)                             |         |
|                                 | Q2 HbA1c*Other                           | -                                              |         | 1.3 (1.9)                             |         |
|                                 | Q3 HbA1c*Other                           | -                                              |         | 0.6 (1.5)                             |         |
|                                 | Q4 HbA1c*Other                           | -                                              |         | 1.4 (1.5)                             |         |
| <b>Cardiac Markers</b>          |                                          |                                                |         |                                       |         |
| NTproBNP,<br>pg/mL              | Q1: [2.5, 60.2)                          | Ref                                            | .03     | Ref                                   | .2      |
|                                 | Q2: [60.2, 139.4)                        | -0.4 (0.3)                                     |         | 0.5 (0.3)                             |         |
|                                 | Q3: [139.4, 366.6)                       | -0.5 (0.3)                                     |         | 0.5 (0.3)                             |         |
|                                 | Q4: [366.6, 33 742]                      | -0.7 (0.3)                                     |         | 0.6 (0.3)                             |         |
| NTproBNP*<br>Race/<br>ethnicity | Q1 NTproBNP*NH-White                     | Ref                                            | .9      | Ref                                   | .5      |
|                                 | Q2 NTproBNP*NH-Black,<br>APOL1 low-risk  | 0.0 (0.4)                                      |         | 0.0 (0.4)                             |         |
|                                 | Q3 NTproBNP*NH-Black,<br>APOL1 low-risk  | 0.1 (0.4)                                      |         | 0.1 (0.4)                             |         |
|                                 | Q4 NTproBNP*NH-Black,<br>APOL1 low-risk  | 0.1 (0.4)                                      |         | 0.3 (0.4)                             |         |
|                                 | Q2 NTproBNP*NH-Black,<br>APOL1 high-risk | -0.1 (0.8)                                     |         | -0.4 (0.7)                            |         |
|                                 | Q3 NTproBNP*NH-Black,<br>APOL1 high-risk | -0.2 (1.0)                                     |         | 0.0 (0.8)                             |         |
|                                 | Q4 NTproBNP*NH-Black,<br>APOL1 high-risk | 0.1 (1.0)                                      |         | 0.0 (0.8)                             |         |
|                                 | Q2 NTproBNP*Hispanic                     | -0.2 (0.6)                                     |         | -0.1 (0.5)                            |         |
|                                 | Q3 NTproBNP*Hispanic                     | 0.7 (0.6)                                      |         | -0.9 (0.5)                            |         |
|                                 | Q4 NTproBNP*Hispanic                     | 0.1 (0.6)                                      |         | -0.3 (0.5)                            |         |
|                                 | Q2 NTproBNP*Other                        | -0.9 (1.0)                                     |         | -2.3 (1.7)                            |         |
|                                 | Q3 NTproBNP*Other                        | -0.4 (1.1)                                     |         | -1.6 (1.4)                            |         |
| Q4 NTproBNP*Other               | -0.7 (1.1)                               | -2.9 (1.7)                                     |         |                                       |         |
| <b>Kidney Injury Marker</b>     |                                          |                                                |         |                                       |         |
| Urine NGAL,<br>ng/ml            | Q1: [0.4, 6.3)                           | Ref                                            | .03     | Ref                                   | .02     |
|                                 | Q2: [6.3, 14.2)                          | -0.3 (0.2)                                     |         | 0.1 (0.2)                             |         |
|                                 | Q3: [14.2, 32.9)                         | -0.7 (0.3)                                     |         | 0.4 (0.2)                             |         |
|                                 | Q4: [32.9, 2743.8]                       | -0.2 (0.3)                                     |         | 0.8 (0.3)                             |         |

|                                   |                                      | With Diabetes                                  |         |                                       |         |
|-----------------------------------|--------------------------------------|------------------------------------------------|---------|---------------------------------------|---------|
|                                   |                                      | eGFR Slope,<br>mL/min/1.73m <sup>2</sup> /year |         | KRT/eGFR Halving                      |         |
|                                   |                                      | Beta Coefficient <sup>a</sup><br>(SE)          | P value | Beta Coefficient <sup>b</sup><br>(SE) | P value |
| Urine NGAL*<br>Race/<br>ethnicity | Q1 NGAL*NH-White                     | Ref                                            | .6      | Ref                                   | .2      |
|                                   | Q2 NGAL*NH-Black,<br>APOL1 low-risk  | 0.1 (0.4)                                      |         | -0.1 (0.3)                            |         |
|                                   | Q3 NGAL*NH-Black,<br>APOL1 low-risk  | 0.5 (0.4)                                      |         | -0.5 (0.3)                            |         |
|                                   | Q4 NGAL*NH-Black,<br>APOL1 low-risk  | -0.3 (0.4)                                     |         | -0.3 (0.4)                            |         |
|                                   | Q2 NGAL*NH-Black,<br>APOL1 high-risk | -0.6 (0.9)                                     |         | 0.6 (0.8)                             |         |
|                                   | Q3 NGAL*NH-Black,<br>APOL1 high-risk | -0.4 (0.9)                                     |         | 0.8 (0.8)                             |         |
|                                   | Q4 NGAL*NH-Black,<br>APOL1 high-risk | -1.8 (1.0)                                     |         | 1.5 (0.9)                             |         |
|                                   | Q2 NGAL*Hispanic                     | 0.4 (0.6)                                      |         | -0.2 (0.6)                            |         |
|                                   | Q3 NGAL*Hispanic                     | 0.0 (0.5)                                      |         | -0.1 (0.5)                            |         |
|                                   | Q4 NGAL*Hispanic                     | -0.7 (0.6)                                     |         | 0.3 (0.5)                             |         |
|                                   | Q2 NGAL*Other                        | 0.4 (0.9)                                      |         | -0.1 (1.6)                            |         |
|                                   | Q3 NGAL*Other                        | 0.8 (1.0)                                      |         | 3.6 (1.6)                             |         |
|                                   | Q4 NGAL*Other                        | -1.0 (1.1)                                     |         | 3.5 (1.5)                             |         |

Abbreviations: BP: blood pressure; CKD: chronic kidney disease; eGFR: estimated glomerular filtration rate; KRT: kidney replacement therapy; HbA1c: glycosylated hemoglobin; NGAL: neutrophil gelatinase-associated lipocalin; NH: non-Hispanic; NTproBNP: N-terminal pro-B-type natriuretic peptide; Ref: reference; SE: standard error; UACR: urine albumin:creatinine ratio

N/A indicates variable was excluded from analysis for indicated outcome as only variables selected by models described in Table 3 were tested for interaction.

SI conversion: To convert Uric acid to  $\mu\text{mol/L}$ , multiply by 59.485. For serum bicarbonate, 1 mEq/L is equivalent to 1 mmol/L.

<sup>a</sup> Negative coefficients represent a faster decline in eGFR compared to the reference group.

<sup>b</sup> Coefficients are the log hazard ratio to the reference level with positive coefficients indicating increased risk of KRT/eGFR Halving compared to the reference group.

\* Indicates interaction between variables. Sum of main and interaction beta coefficients will provide estimate for given group.



## References

1. Parsa A, Kao WH, Xie D, et al. APOL1 risk variants, race, and progression of chronic kidney disease. *N Engl J Med*. 2013;369(23):2183-2196.
2. Baumgartner RN, Chumlea WC, Roche AF. Bioelectric impedance phase angle and body composition. *AmJClinNutr*. 1988;48(1):16-23.
3. Chumlea WC, Guo SS, Kuczmarski RJ, et al. Body composition estimates from NHANES III bioelectrical impedance data. *IntJObesRelat Metab Disord*. 2002;26(12):1596-1609.
4. Matthews DR, Hosker JP, Rudenski AS, Naylor BA, Treacher DF, Turner RC. Homeostasis model assessment: insulin resistance and beta-cell function from fasting plasma glucose and insulin concentrations in man. *Diabetologia*. 1985;28(7):412-419.
5. National Center for Health S. National Health and Nutrition Examination Survey Anthropometry Procedures Manual. *Centers for Disease Control and Prevention*. 2000.
6. Joffe M, Hsu CY, Feldman HI, Weir M, Landis JR, Hamm LL. Variability of creatinine measurements in clinical laboratories: results from the CRIC study. *AmJNephrol*. 2010;31(5):426-434.
7. Levey AS, Coresh J, Greene T, et al. Expressing the Modification of Diet in Renal Disease Study equation for estimating glomerular filtration rate with standardized serum creatinine values. *ClinChem*. 2007;53(4):766-772.
8. Anderson AH, Yang W, Hsu CY, et al. Estimating GFR among participants in the Chronic Renal Insufficiency Cohort (CRIC) Study. *Am J Kidney Dis*. 2012;60(2):250-261.
9. Yang W, Xie D, Anderson AH, et al. Association of Kidney Disease Outcomes With Risk Factors for CKD: Findings From the Chronic Renal Insufficiency Cohort (CRIC) Study. *Am J Kidney Dis*. 2013.
10. Jones BL, Nagin DS. A Stata Plugin for Estimating Group-Based Trajectory Models. 2012.
11. Isakova T, Cai X, Lee J, et al. Longitudinal FGF23 Trajectories and Mortality in Patients with CKD. *J Am Soc Nephrol*. 2018;29(2):579-590.
12. JONES BL, NAGIN DS, ROEDER K. A SAS Procedure Based on Mixture Models for Estimating Developmental Trajectories. *Sociological Methods & Research*. 2001;29(3):374-393.
13. Nagin DS, Odgers CL. Group-based trajectory modeling in clinical research. *Annu Rev Clin Psychol*. 2010;6:109-138.
